# Supplementary material
Source: MDPI journal article supplement (https://www.mdpi.com/2071-1050/13/14/7975)
Supplement: s1 [file s1]

# RIBuild WP5 software tool

WP5 software tool has been developed within RIBuild Work Package 5 “*Development of cost/benefit and environmental impact assessment methodology based on building practice and intended use*”, whose aim was the development of a “probabilistic” approach for assessing the environmental impacts and global costs of internal insulation solutions for historic buildings based on a life cycle perspective. The Life Cycle Assessment (LCA) and Life Cycle Costing (LCC) probabilistic methodologies developed in RIBuild WP5 are documented in deliverable reports 5.1 and 5.2. and available at this link: <https://www.ribuild.eu/work-packages>.

The LCC and LCA probabilistic approach, based on Monte-Carlo simulation, provides real-time estimates of the range and likelihood of the life-cycle costs and impacts, rather than single deterministic results, based on data inputs distributions, and can be used to support decision making. The tool for sensitivity analysis included in WP5 software offers an idea of the significance of input parameters’ uncertainties and their impacts on the results.

The software allows performing the LCA and LCC “at component level”, i.e. the assessments are performed for 1 m<sup>2</sup> of internally insulated walls (“case studies”), under several possible scenarios (energy scenarios, macro-economic scenarios and calculation periods). WP5 software tool already includes a database of case studies, based on RIBuild project research, and related LCA and LCC data inputs are set. As shown later, the user can start from them and modify related input data, if needed, or can add new cases he wants to assess.

This guide provides instructions for the use of WP5 software tool. Appendix 1 reports details on the LCA and LCC calculation assumptions, Appendix 2 presents the list of the national case studies included in the software database, Appendix 3 provides the software license.

## Index

|     |                                            |    |
|-----|--------------------------------------------|----|
| 1.2 | USER GUIDE .....                           | 3  |
|     | <i>home</i> .....                          | 3  |
|     | <i>pre-processing</i> .....                | 3  |
|     | <i>editing</i> .....                       | 6  |
|     | <i>lcc run</i> .....                       | 7  |
|     | <i>lca run</i> .....                       | 9  |
|     | <i>save results</i> .....                  | 11 |
| 1.3 | APPENDIX 1. CALCULATION ASSUMPTIONS .....  | 12 |
|     | <i>wall heat transmission losses</i> ..... | 12 |
|     | <i>lca</i> .....                           | 12 |
|     | <i>lcc</i> .....                           | 16 |

1.4 APPENDIX 2. LIST OF CASE STUDIES INCLUDED INTO THE TOOL DATABASE..... 22

*materials*..... 27

*insulation systems/case studies*..... 30

*energy sources*..... 35

1.5 APPENDIX 3. SOFTWARE LICENSE ..... 38

## 1.2 User guide

The tool web interface (Figure 1) contains the Main Menu with the following items: *Home*, *Pre-processing*, *Editing*, *LCC Run*, *LCA Run*, *Save results*.

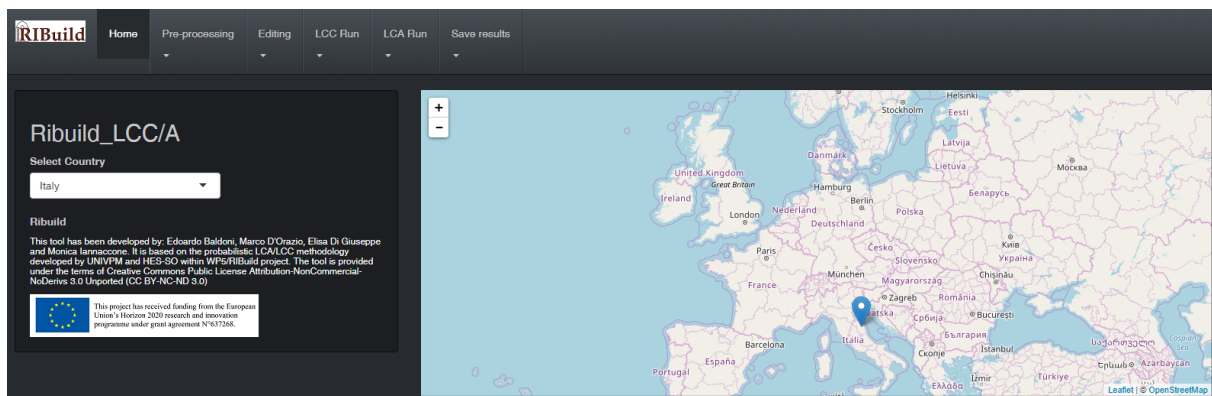

Figure 1 WP5 software tool homepage

### Home

In the *Home* page (Figure 2), the user can select the Country where perform the LCC or the LCA assessment (or both). According to this selection, the internally insulated wall case studies included in the software database are filtered, and consequently specific national LCC and LCA data input are automatically selected. However, the user can always modify later (*Editing* menu) LCC and LCA data input, if he wants to assess new and different cases.

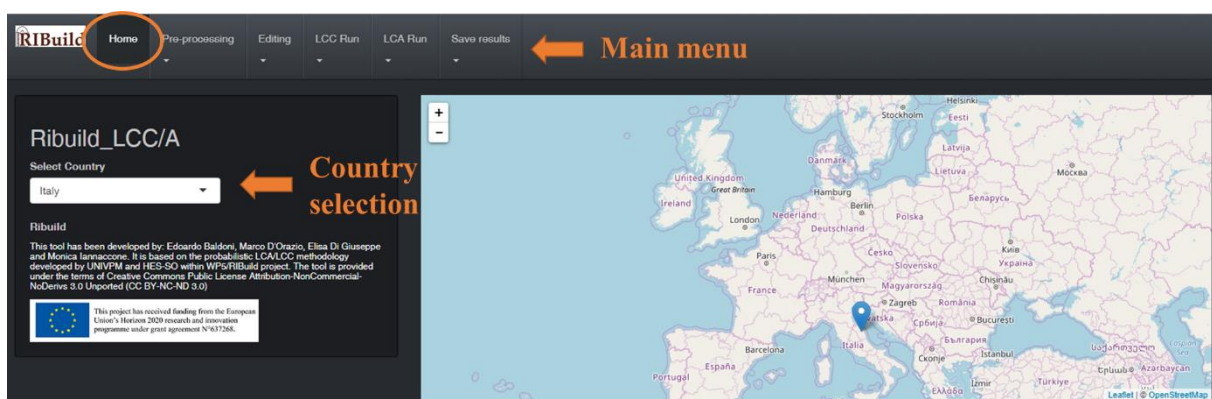

Figure 2 WP5 software tool homepage. Country selection.

### Pre-processing

The *Pre-processing* menu contains the following items: *Visualize data*, *New system impact generation*, *Economic Scenario visualization*, *Qh calculation*.

#### Visualize data

In *Visualize data* (Figure 3), the user selects the insulation systems included into the database (for the previously selected country) and, by pushing on *visualize* button, he gets the Probability Distributions (PDFs) of the related LCA and LCC data inputs, i.e.: the system CI (investment cost), CM (maintenance cost), SL (service life), sI (environmental impact related to the production phase), smI (environmental impact related to the maintenance phase), EoLI (environmental impact related to the end of life phase).

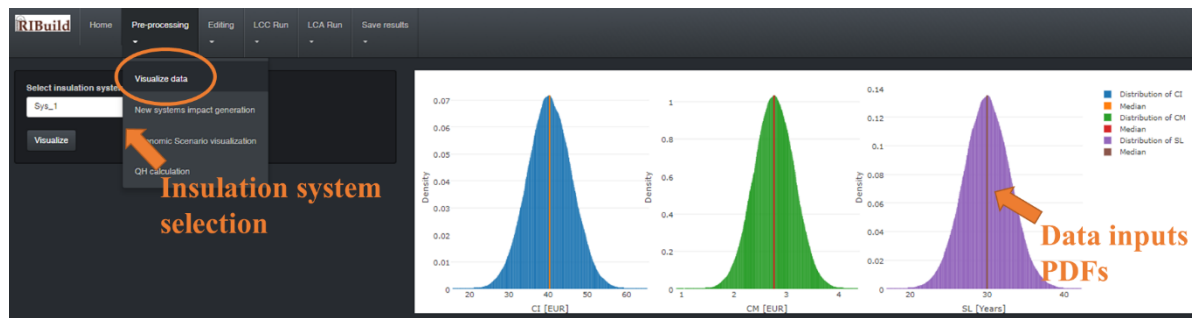

Figure 3 Pre-processing menu → Visualize data, visualization of the PDFs of LCA and LCC data inputs

## New system impact generation

In *New system impact generation* (Figure 4), the user can create a new insulation system based on the materials available in the database, and calculate its environmental impact due to production, maintenance and end of life phases.

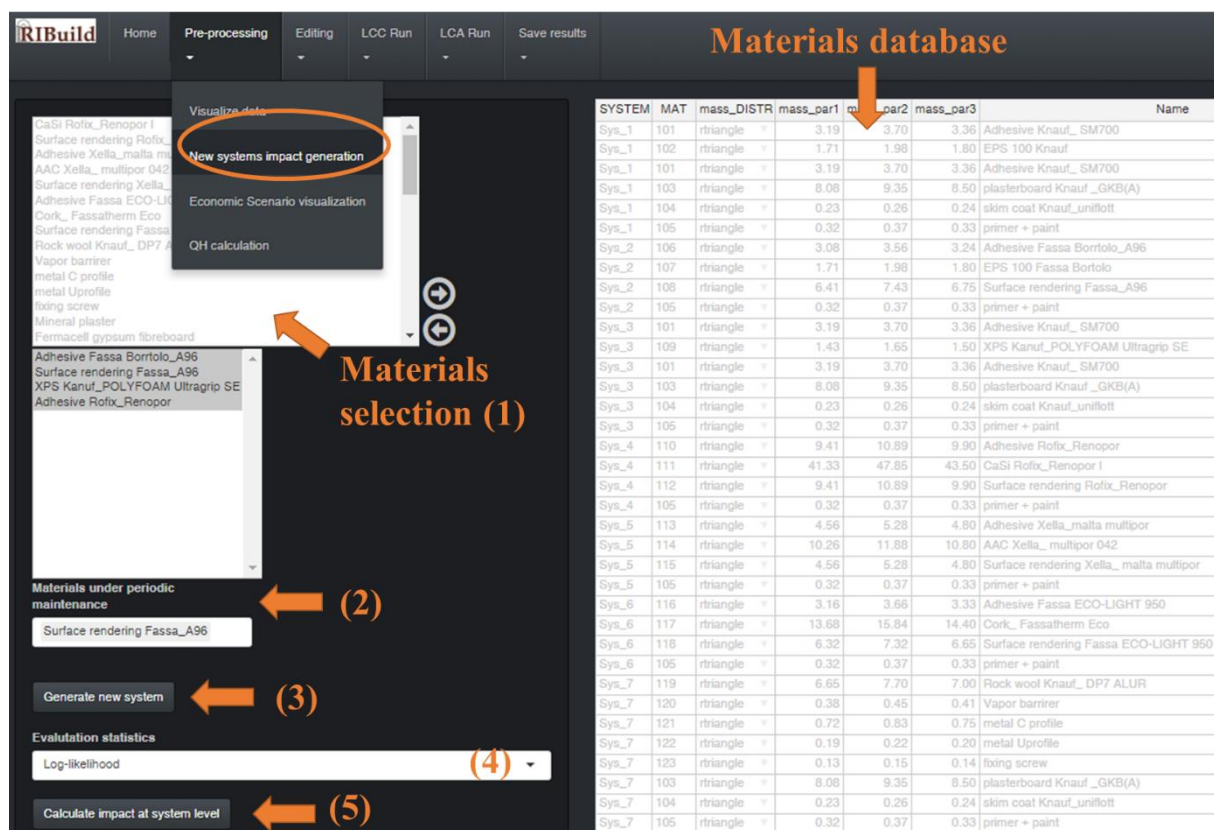

Figure 4 Pre-processing menu → New system impact generation. Procedure for the creation of a new insulation system based on the materials available in the database and calculation of its environmental impact due to production, maintenance and end of life phases.

At this aim, the user must (1) select the materials composing the new insulation system by highlighting their name on the table on the top left (multiple selection through CTRL or SHIFT is allowed) and pushing on the right arrow. Left arrow can be used to remove materials from the selection. The user can also directly edit materials data reported on the material database (table on the right) in order to personalize some materials' informations.

Then the user can (2) decide which materials of those selected will be subjected to periodic maintenance (if any), e.g. the internal painting (considering a maintenance frequency equal to the painting material service life reported in the table on the right).

Finally (3) the user must push the *generate new system* button. The new system generated is now included at the end of the table on the right (with a progressive numbering).

In order to calculate the environmental impact at insulation system level starting from the materials' impacts, it is necessary to (4) establish the evaluation statistics typology (Log-likelihood or Akaike criterion) and then (5) push the *Calculate impact at system level* button. The calculation is performed through basic random Monte-Carlo with 1000 iterations and distributions are estimated through a data-fitting test. Negative values for the impacts are not taken into account, so normal distributions are automatically converted into truncated normal distributions. The calculation may take a few dozen seconds (a time bar will appear on the right).

## QH calculation

In *QH calculation* (Figure 5), the user can assess the heat transmission losses through the wall during the heating period [kWh/year] based on a simplified Heating Degree Days (HDD) methodology, as described in Appendix 1<sup>1</sup>. Qh can refer to the heat losses before (Qh<sub>pre</sub>) or after (Qh<sub>post</sub>) the insulation intervention.

For the case studies included into the software database, Qh<sub>pre</sub> and Qh<sub>post</sub> are already defined. However, the user can take this step to personalize his assessment.

In *QH calculation*, the user must:

1. select the insulation system;
2. select the EU region for the assessment<sup>2</sup>;
3. select the existing wall surface-to-surface thermal resistance range [m<sup>2</sup>K/W] (surfaces thermal resistances excluded).

If the user is evaluating a new system created under *New system impact generation*, he must also provide a value (*DU*) for the surface-to-surface thermal resistance of the insulation system (m<sup>2</sup>K/W) (surfaces thermal resistances excluded).

Once pushed the *Run* button (4), summary data (5) and PDFs of Qh<sub>post</sub> and Qh<sub>pre</sub> for the case study will be represented on the right. These data can be copied (CTRL+c), to be used in the following editing menu, as shown later.

---

<sup>1</sup> See also deliverable reports D5.1 and 5.2 for further details.

<sup>2</sup> Countries climates are represented through HDD distributions, obtained from Eurostat data: cooling and heating degree days by NUTS 2 regions. Available from: [http://ec.europa.eu/eurostat/web/products-datasets/-/nrg\\_chddr2\\_a](http://ec.europa.eu/eurostat/web/products-datasets/-/nrg_chddr2_a)

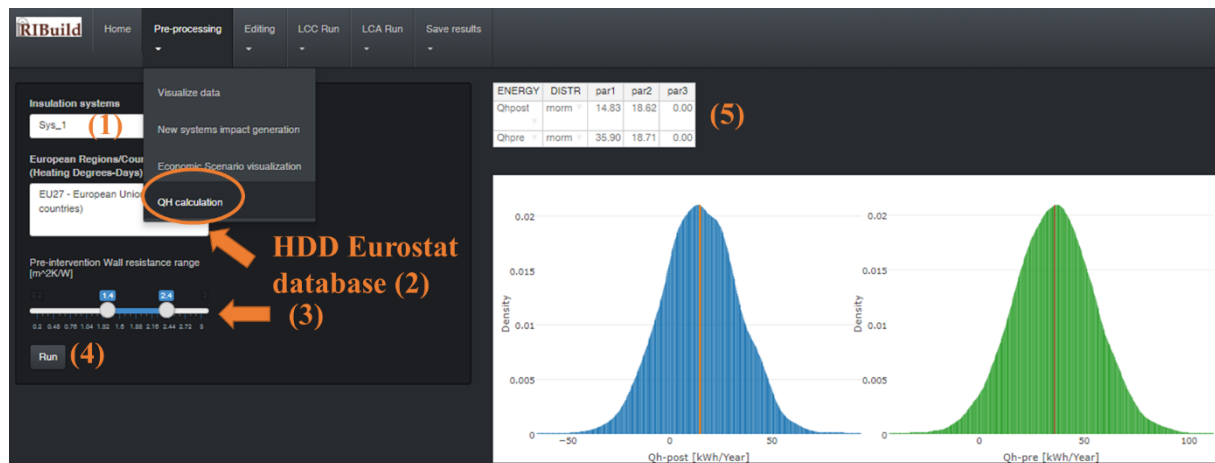

Figure 5 Pre-processing menu → QH calculation. Assessment of the  $Q_{hpost}$  and  $Q_{hpre}$  for a certain case study, based on the simplified HDD methodology (option 3).

## Editing

The *Editing* menu contains the following items: *Edit case study*, *Edit Energy Source*.

### Edit case study

In *Edit case study*, the user can visualize all inputs data of the case studies included into the tool database or create a new case study, starting from the insulation system created in *New system impact generation*.

To visualize the summary data of a case study (Figure 6), the user (1) selects the case study name, to which an insulation system is associated (2). After pushing *Confirm* button (3), summary data inputs on tables will appear on the right (4).

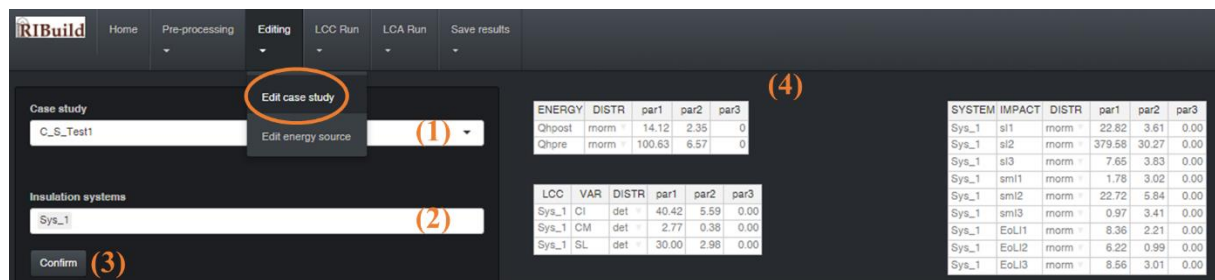

Figure 6 Editing menu → Edit case study. Visualization of the summary data of a case study.

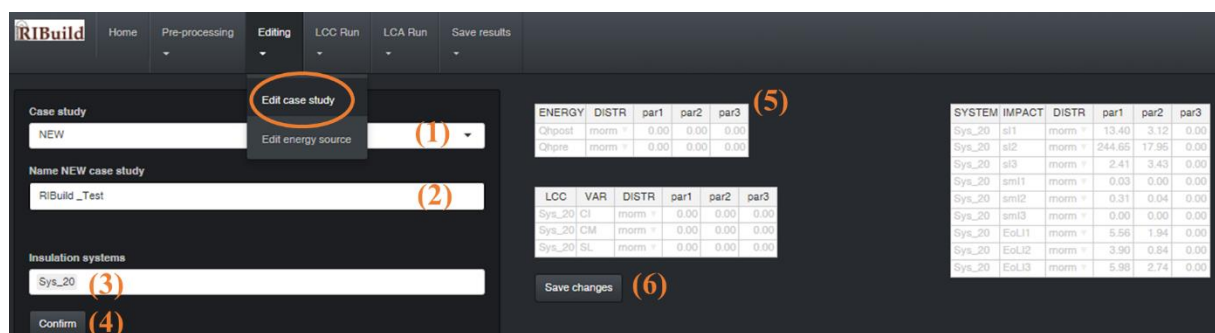

Figure 7 Editing menu → Edit case study. Creation of a new case study.

To create a new case study (Figure 7), the user selects the *NEW* option from the bar (1) and write a name for the case study (2). Then he selects the insulation system to be included in the case study from the bar (3) and push the *Confirm* button (4).

Summary input tables will appear on the right (5), only including data related to the insulation system.

Data on  $Q_{h,post}$ ,  $Q_{h,pre}$ , investment cost (CI), maintenance cost (CM) and system service life (SL) must be provided and then *Save changes* button must be pushed to save the new case study. Notice that this procedure must be applied when the user assesses  $Q_{h,post}$  and  $Q_{h,pre}$  through the HDD method included in the tool (as previously described).

### Edit energy source

Similarly, in *Edit energy source* (Figure 8), the user can visualize data of the national energy scenarios included into the tool database (filtered by Country) or create a new energy scenario, with similar procedure to that just described for a new case-study.

The energy scenario represents the heating source of the building where the wall case study is applied. The following inputs data are related to this choice: EnT (energy national tariff), EnFc (conversion factor to Primary Energy, to be set equal to 1 in LCC and established according to national laws for LCA), ETAh (overall heating equipment efficiency for heating), EI\_1, EI\_2, EI\_3 (unitary impact of the energy vector according to impact indicators 1, 2, 3<sup>3</sup>).

The figure consists of two screenshots of the IRIBuild software interface. The top screenshot shows the 'Editing' menu with 'Edit energy source' circled in orange and labeled with a red (1). The bottom screenshot shows the 'NEW' option selected in the 'Energy Source' dropdown, labeled with a red (2), and the 'Save changes' button visible.

| ENERGY | DISTR | par1 | par2 | par3 |
|--------|-------|------|------|------|
| EnT    | runif | 0.07 | 0.09 | 0    |
| EnFc   | det   | 1.05 | 0.00 | 0    |
| ETAh   | runif | 0.60 | 1.00 | 0    |
| EI_1   | morm  | 0.26 | 0.04 | 0    |
| EI_2   | morm  | 4.20 | 1.06 | 0    |
| EI_3   | morm  | 0.03 | 0.01 | 0    |

Figure 8 Editing menu → *Edit energy source*. Visualization of the summary data of an energy source (above) and creation of a new energy source (below).

### LCC Run

The *LCC Run* menu contains *LCC analysis*, in order to perform the Monte-Carlo based LCC and *LCC - Sensitivity analysis*, to calculate the sensitivity indices<sup>4</sup>.

<sup>3</sup> See Appendix 1 of the present guide for further details on the inputs data

<sup>4</sup> See section 2.7 of deliverable report D5.2 for further details on the sensitivity analysis method.



## LCC Analysis

In *LCC Analysis* (Figure 9), the user (1) selects the case study to be assessed, among those in the tool database or among those created or edited during the work session. The user must also select the scenarios for the assessment: the energy scenario (2), the calculation period (4) - dragging the specific slider -, the macro-economic scenario (5). Finally, the user must choose the number of iterations<sup>5</sup> for the Monte Carlo calculation (3) and then push the *Compute* button (6). The calculation may take a few tens of seconds or some minutes depending on the simulations number (a time bar will appear on the right).

Once finished, the following results will appear on the right:

- the output probability and cumulative density functions for the Global Costs (GC) and Payback period (PB);
- Tables for each graph summarizing the simulations number, the mean value, the median value and the standard deviation of the PDF obtained.
- A table (down in the page) including an example of the yearly evolution of outputs from a single draw of input data.

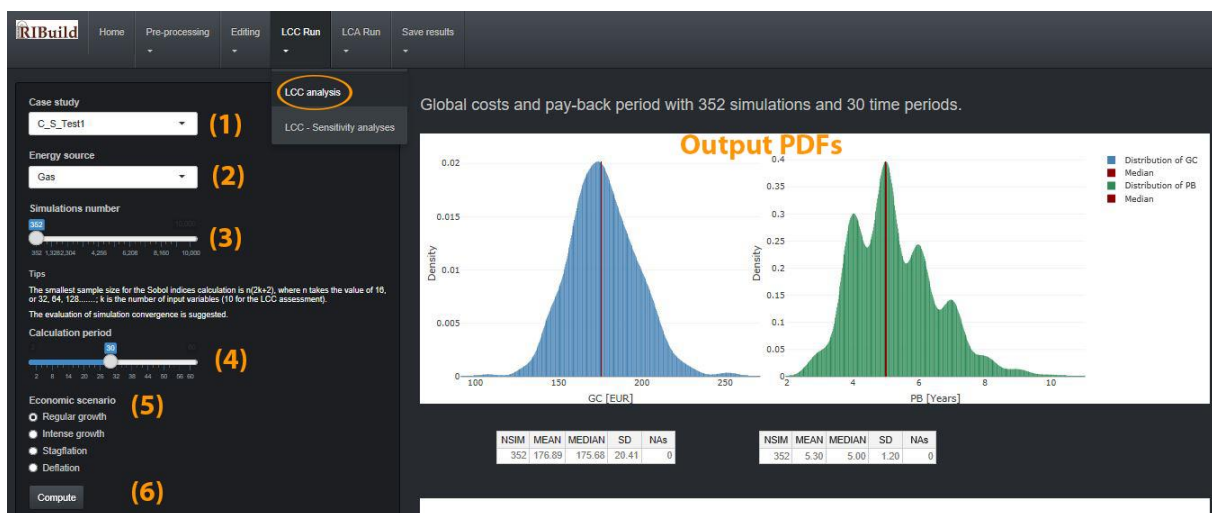

Figure 9 LCC Run menu → LCC analysis. Assessment of the Global Cost and Payback period for a certain case study.

## LCC – Sensitivity Analysis

*LCC – Sensitivity analysis* can be performed after concluding the LCC assessment. Here the user can evaluate the Sobol's sensitivity indices according to the methods 1 and 2 documented in sections 2.6 and 3.5 of deliverable report 5.2.

Concerning the Sensitivity *Method 1* (Figure 10), the user directly gets the first and total order Sobol's indices by selecting the method (2) and pushing on *Run sensitivity analysis* button (3). The graph and table representing the first and total order indices for the LCC inputs obtained will appear on the right.

<sup>5</sup> The software suggests the minimum number of iterations required. It is left to the user to establish the proper number of iterations to obtain an accurate result, based on a result convergence analysis.



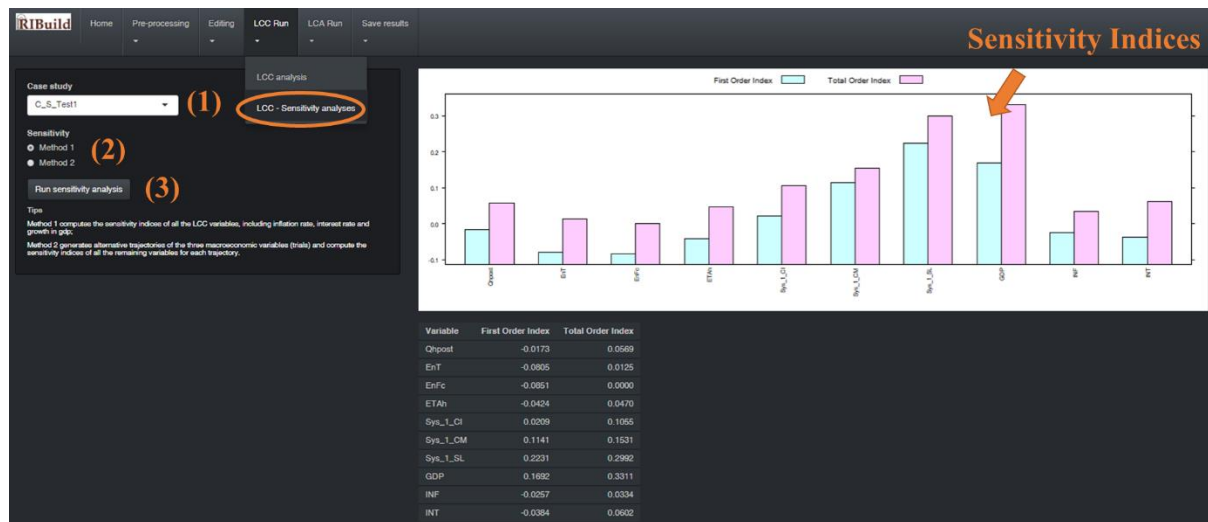

Figure 10 LCC Run menu → LCC – Sensitivity analysis. Calculation of the Sobol’s first and total order indices for LCC inputs with Method 1

Concerning the Sensitivity *Method 2* (Figure 11), the user must also select the number of simulation trajectories of the economic parameters (3) and then obtain the distribution of first and total order Sobol’s indices by pushing on *Run sensitivity analysis* button (4). The graph and table representing the obtained first and total order indices for LCC inputs will appear on the right.

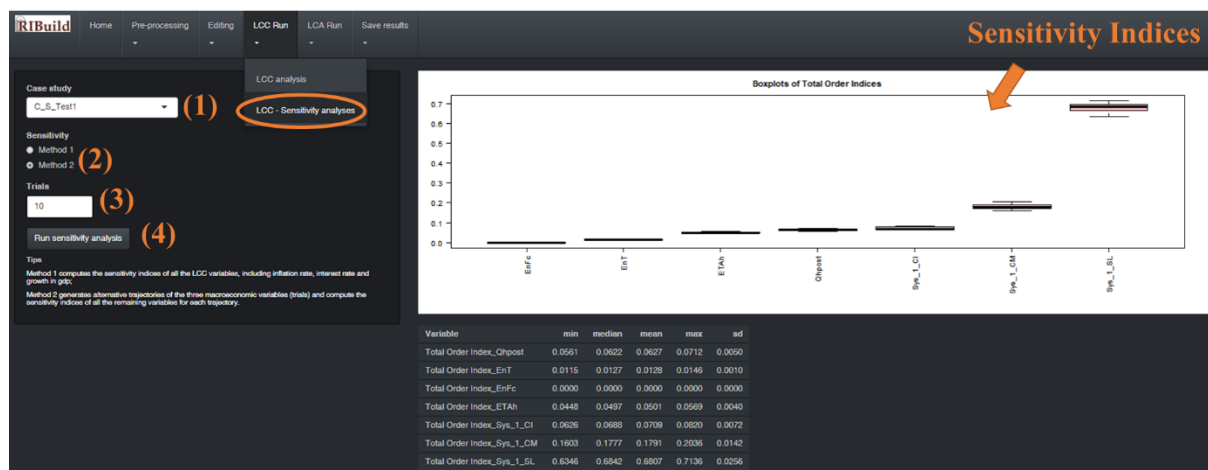

Figure 11 LCC Run menu → LCC – Sensitivity analysis. Calculation of the Sobol’s first order and total order indices for LCC inputs with Method 2

## LCA Run

The *LCA Run* menu contains the following items: *LCA*, *LCA – Sensitivity analysis*, in order to perform the Monte-Carlo based LCA and the calculation of sensitivity indices<sup>6</sup>.

<sup>6</sup> See section 2.6 of deliverable report D5.1 for further details on the sensitivity analysis method.

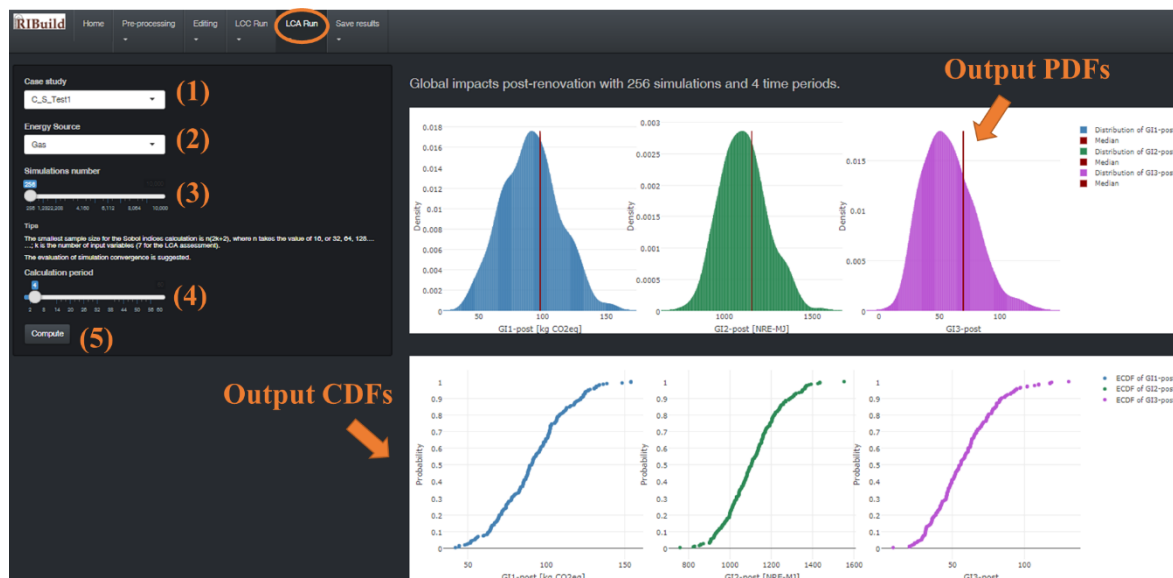

Figure 12 LCA Run menu → LCA. Assessment of the environmental impacts results for a certain case study.

In LCA (Figure 12), the user (1) selects the case study to be assessed, among those in the tool database, or among those created or edited during the working session. He must also select the scenarios for the assessment: the energy scenario (2) and the calculation period (4) - dragging the specific slider. Finally, he must choose the number of iterations<sup>7</sup> for the Monte Carlo calculation (3) and then push the *Compute* button (5). The calculation may take a few dozen seconds or some minutes depending on the simulations number (a time bar will appear on the right).

Once finished, the following results will appear on the right:

- the output probability and cumulative density functions for the post-renovation and pre-renovation Global Impacts (GI) according to the specific environmental indicators (1,2,3);
- the output probability and cumulative density functions for the Global Impacts savings according to the specific environmental indicators;
- Tables for each graph summarizing the simulations number, the mean value, the median value and the standard deviation of the PDFs obtained.

## LCA – Sensitivity analysis

LCA – *Sensitivity analysis* can be performed after concluding the LCA assessment (Figure 13). Here the user can evaluate the sensitivity first and total order Sobol's indices for each Impact indicator, to be selected in (2), by pushing on *Run sensitivity analysis* button (3). The graph and table representing the first and total order indices for the LCA inputs obtained will appear on the right.

<sup>7</sup> The software suggests the minimum number of iterations required. It is let to the user to establish the proper number of iterations to obtain an accurate result, based on a result convergence analysis.

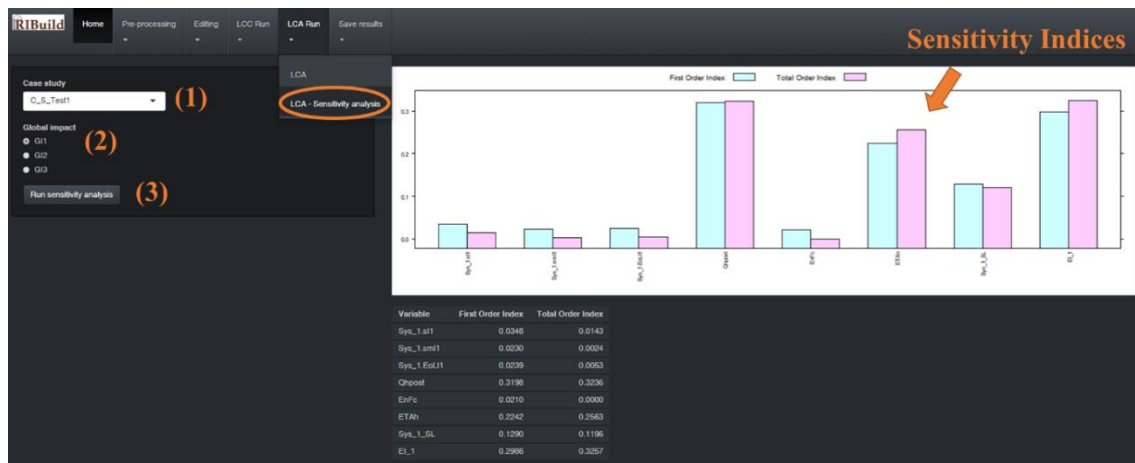

Figure 13 LCA Run menu → LCA – Sensitivity analysis. Calculation of the Sobol first order and total order indices for the LCA inputs.

## Save results

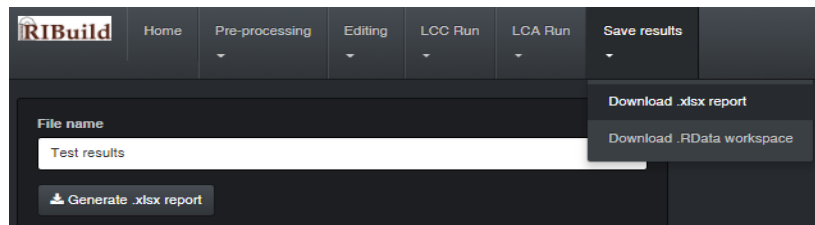

Figure 14 Save results menu.

Once the assessment is performed, results can be saved as *.xlsx* file (Figure 14). A file name must be filled and the generation button pushed. In separate sheets, the excel file contains:

- a summary of the input data PDFs;
- the whole input samples.

Then, for LCA:

- the whole output samples;
- The first and total order sensitivity indices for each environmental indicator.

And for LCC:

- the whole output samples;
- the cost shares defined as:  

$$\text{SHARE}_{\text{inv}} = (\text{investment cost} + \text{replacement cost} - \text{residual value}) / (\text{global cost})$$

$$\text{SHARE}_{\text{maint}} = (\text{maintenance cost}) / (\text{global cost})$$

$$\text{SHARE}_{\text{energy}} = (\text{energy cost post renovation}) / (\text{global cost});$$
- The first and total order sensitivity indices related to the Method 1 and 2.

## 1.3 Appendix 1. Calculation Assumptions

### *Wall heat transmission losses*

The LCA assessment requires input data on transmission heat losses before and after the renovation measure, in order to account for the use phase. As the LCA/LCC is performed at “component level”, the operational energy use is considered the only heat transmission losses through the wall during the heating season.

A simplified calculation is included in WP5 tool based on an annual Heating Degree Days (HDD) method (Eq. 1):

$$Q_h = \frac{U}{1000} \cdot \text{HDD} \cdot \text{HH} \text{ [kWh/m}^2\text{]}$$

Eq. 1

Where:

$Q_h$  is the heat loss through the wall [kWh/m<sup>2</sup>]

$U$  is the wall U-value [W/m<sup>2</sup>K]

HH is the heating hours a day [h] (set at 24 hours)

HDD are the annual heating degree-days [K]

The U-value of the wall is calculated with the following Eq. 2:

$$U = \frac{1}{R_{si} + R_{se} + R_w + R_{is}} \text{ [W/m}^2\text{K]}$$

Eq. 2

Where:

$R_{si}$  and  $R_{se}$  are the internal and external surface resistances:  $R_{si} = 0.13 \text{ [m}^2\text{K/W]}$  and  $R_{se} = 0.04 \text{ [m}^2\text{K/W]}$

$R_w$  is the original wall surface-to-surface thermal resistance [m<sup>2</sup>K/W]

$R_{is}$  is the applied insulation system surface-to-surface thermal resistance [m<sup>2</sup>K/W] (insulation system comprising different layers of materials).

Next to this method, the user can provide  $Q_h$  in the tool based on other more accurate methods, as coupled heat and mass (HAM) transfer numerical models based on hourly climate data<sup>8</sup>.

### **LCA**

The calculation of the environmental impacts of the insulation systems is based on the methodology developed in RIBuild Task 5.2 and described in deliverable report 5.1, which is here summarised.

### **Calculation assumptions**

The probabilistic LCA is performed at “component level” and is based on the procedures defined in ISO 14040-14044 and EN 15804 and EN 15978 standards.

---

<sup>8</sup> See also deliverable reports D5.1 and 5.2 for further details.

The goal of the study is to assess the environmental impacts of internal insulation measures installed on historic building facades. The functional unit (FU) is defined as “*the insulation intervention using several possible internal insulation systems and technologies needed to cover 1 m<sup>2</sup> of facade for a building reference study period<sup>9</sup> expressed in years*”.

The scope of the study comprises the assessment of the environmental impacts of construction materials and the transmission heat losses assuming a given energy scenario, e.g. a heat source to convert the energy needs in final energy. The impacts of the new internal insulation systems after renovation cover next to the manufacturing and dismantling at the end-of-life, the use phase impacts related to the possible needs for maintenance and replacement of material layers or of the whole insulation system.

The maintenance measures can vary depending on the study context (country, location, type of wall and insulation system). At the aim of the probabilistic LCA of internal insulation on historic building, the *maintenance* is considered as the need of periodic replacement of the internal finishing material, i.e. the rendering or the painting, which depends on these specific materials’ estimated service lives. Instead, *replacement* involves the whole insulation system, according to its estimated service life.

As a result, the following life cycle stages are included in the RIBuild LCA methodology: the production stage (modules A1-A3), the use stage (modules B2 maintenance, B4 replacement and B6 operational energy use) and the End of Life (EoL) stage (modules C1-C4), as summarized in Figure 15.

The LCA should be calculated for at least two environmental indicators, namely the Climate Change and the non-renewable Cumulative Energy Demand (CED<sub>NRE</sub>). The WP5 software tool allows the user to use an additional third indicator at his choice.

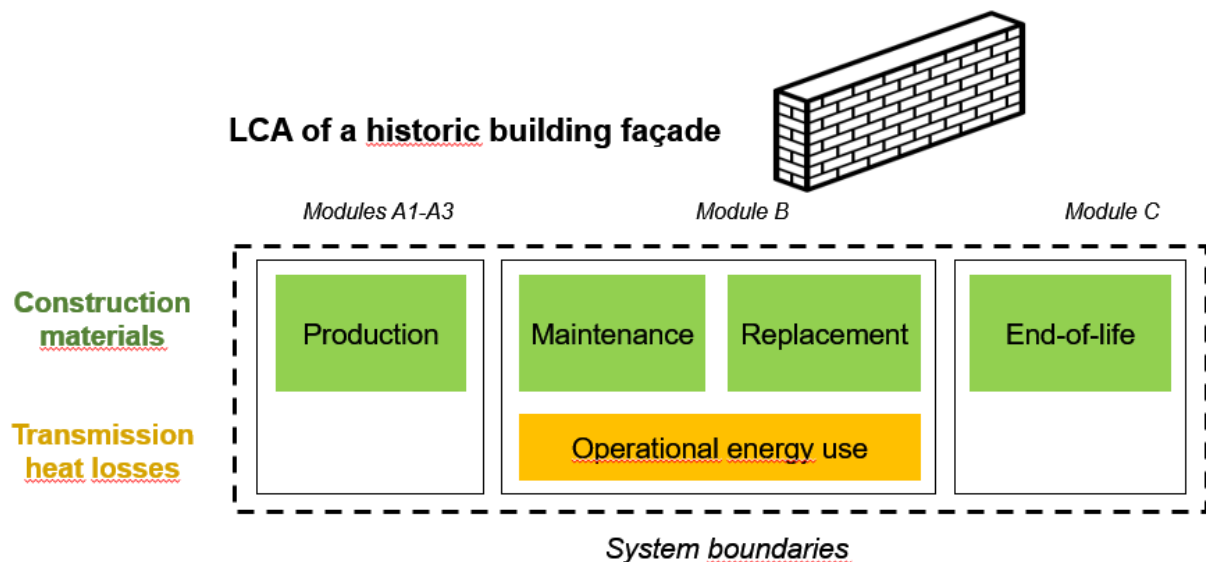

Figure 15 System boundaries for the LCA

### Calculation equations included in the software model

The environmental impacts are obtained through the following equations (Eq. 3 and Eq. 4):

<sup>9</sup> Conventional term introduced in EN 15804 and EN 15978. Here this term is used in an equivalent manner to “calculation period”.

$$IG1 = \left\{ \left( \sum_{j=1}^n sI1_j \right) + \left( \sum_{j=1}^n (sI1_j * s_j) \right) + \left( \sum_{j=1}^n EoLI1_j \right) + \left( \sum_{j=1}^n (EoLI1_j * s_j) \right) + \sum_{i=1}^{cp} \left( \frac{Q_h}{ETA_h} * EI1_i * EnFc \right) + \left( \sum_{j=1}^n smI1_j \right) \right\} [kgCO2eq]$$

**Eq. 3**

$$IG2 = \left\{ \left( \sum_{j=1}^n sI2_j \right) + \left( \sum_{j=1}^n (sI2_j * s_j) \right) + \left( \sum_{j=1}^n EoLI2_j \right) + \left( \sum_{j=1}^n (EoLI2_j * s_j) \right) + \sum_{i=1}^{cp} \left( \frac{Q_h}{ETA_h} * EI2_i * EnFc \right) + \left( \sum_{j=1}^n smI2_j \right) \right\} [NRE - MJ]$$

**Eq. 4**

with the subscripts: i=year i-th; j= system j-th; k= material k-th; and 1 or 2 referred to the specific environmental indicators.

Where:

- $IG1$  is the Global Impact expressed in terms of Climate Change-GWP [kgCO<sub>2</sub>eq];
- $IG2$  is the Global Impact expressed in terms of non-renewable Cumulative Energy Demand [CED<sub>NRE</sub> - MJ];
- $sI_j$  is the j-System environmental impact related to production phase (Eq. 5);

$$sI_j = \left\{ \begin{array}{l} \sum_{k=1}^n UI1_k * m_k [kgCO2eq] \\ \sum_{k=1}^n UI2_k * m_k [NRE - MJ] \end{array} \right\}$$

**Eq. 5**

and:

- $UI_k$  is the unitary production impact of the k-material composing the j-System [kgCO<sub>2</sub>eq/kg] or [NRE - MJ/kg];
- $m_k$  is the mass of the k-material [kg];
- $s_j$  is the number of replacements of the j-System within the calculation period  $cp$  [years], considering the j-System Service Life  $SL_j$  [years] (Eq. 6);

$$s_j = \text{int} \left( \frac{cp - 1}{SL_j} [-] \right)$$

**Eq. 6**

- $EoLI_j$  is the j-System environmental impact related to the End of Life phase (Eq. 7);

$$EoLI_j = \left\{ \begin{array}{l} \sum_{k=1}^n EOL1_k * m_k [kgCO2eq] \\ \sum_{k=1}^n EOL2_k * m_k [NRE - MJ] \end{array} \right\}$$

**Eq. 7**

and:

- EOL<sub>k</sub> is the unitary End of Life impact of the k-material composing the j-System [kgCO<sub>2</sub>eq/kg] or [NRE - MJ/kg];
- $EI_i$  is the unitary impact of the energy vector at year i-th;
- $Q_h$  is the heat transmission losses through the wall during the heating period [kWh/year];  $Q_h$  can refer to the heat losses before ( $Q_{hpre}$ ) or after ( $Q_{hpost}$ ) the insulation intervention.
- $ETA_h$  is the overall system efficiency for heating [-];
- $EnFc$  is the conversion factor from delivered to primary energy [-];
- $smI_j$  is the k-Material environmental impact related to the Material replacement (System periodic maintenance) (Eq. 8);

$$smI_j = \left\{ \begin{array}{l} \sum_{k=1}^n UI_{1k} * m_k * s_k \text{ [kgCO}_2\text{eq]} \\ \sum_{k=1}^n UI_{2k} * m_k * s_k \text{ [NRE - MJ]} \end{array} \right\}$$

Eq. 8

and:

- $s_k$  is the number of replacements of the k-material within the calculation period  $cp$  [years], considering the k-material Service Life  $sl_k$  [years] (Eq. 9)

$$s_k = \text{int} \left( \frac{cp - 1}{sl_k} [-] \right)$$

Eq. 9

The parameters included from Eq. 3 to Eq. 9 are summarized in Table 1.

**Table 1 Input parameters of the LCA included in the software tool**

| Input Parameter                                                     | Symbol  | Unit                                                      |
|---------------------------------------------------------------------|---------|-----------------------------------------------------------|
| Replacement coefficient for System j-th                             | $s_j$   | [-]                                                       |
| Replacement coefficient for Material k-th                           | $s_k$   | [-]                                                       |
| Calculation period                                                  | $cp$    | [year]                                                    |
| Service Life for System j-th                                        | $SL_j$  | [year]                                                    |
| Service Life for Material k-th                                      | $sl_k$  | [year]                                                    |
| Unitary production impact of the material k-th                      | $UI_k$  | [kgCO <sub>2</sub> eq/kg] or [CED <sub>NRE</sub> - MJ/kg] |
| Unitary End of Life impact of the material k-th                     | $EOL_k$ | [kgCO <sub>2</sub> eq/kg] or [CED <sub>NRE</sub> - MJ/kg] |
| Mass of the material k-th                                           | $m_k$   | [kg]                                                      |
| Heat transmission losses through the wall during the heating period | $Q_h$   | [kWh/year]                                                |



|                                                    |         |                                                           |
|----------------------------------------------------|---------|-----------------------------------------------------------|
| Overall system efficiency for heating              | $ETA_h$ | [-]                                                       |
| Unitary impact of the energy vector at year i-th   | $EI_i$  | [kgCO <sub>2</sub> eq/kWh]<br>[CED <sub>NRE</sub> MJ/kWh] |
| Conversion factor from delivered to primary energy | $EnFc$  | [-]                                                       |

## LCC

### Calculation assumptions

The probabilistic LCC is performed at “component level” (component-level LCC analysis) and is based on the procedures of EN 15459-1:2017 and ISO 15686-5:2017, in order to calculate two possible economic indicators:

- The Global Cost (GC);
- The Payback Period (PB).

The functional unit (FU)<sup>10</sup> of the LCC is defined as “*the insulation intervention using a possible interior insulation system needed to cover 1 m<sup>2</sup> of façade for a calculation period expressed in years*”.

Methodology developed and implemented allows the calculation in different study periods to compare the results on different time horizons, also taking into account the following references: the European Commission Delegated Regulation No 244/2012 and its Guidelines suggest a calculation period of 30 years for residential and public buildings and of 20 years for commercial buildings; IEA Annex 56 suggests to use a reference study period of 60 years; EN 15459-1:2017 suggests calculation periods of 50 years for residential buildings, 20 years for commercial buildings and 30 years for other typologies.

The scope of the methodology comprises the assessment of the economic impacts and the transmission heat losses of the insulation solution (assuming a given energy and economic scenario, and a calculation period). The LCC of the new interior insulation systems after renovation covers next to the investment costs, the use phase costs related to the possible needs for maintenance and replacement of material layers or whole insulation system and costs related to the energy consumptions.

The cost categories included in the calculation are the following (Figure 16)<sup>11</sup>: Initial investment cost; Energy cost; Maintenance cost; Replacement cost.

The initial investment cost (CI) represents the cost for the purchase and construction/installation of the design option (insulation system) considered. In general, the investment cost is composed by the cost of each material belonging to the design option and the labour cost of its installation, depending on the installation procedure and the necessary installation time.

<sup>10</sup> Even if in LCC the definition of a Functional Unit is not a mandatory requirement, it is defined here for consistency with the probabilistic LCA methodology.

<sup>11</sup> The cost of greenhouse gas emissions is neglected because LCC is performed in the perspective of a building designer or owner.

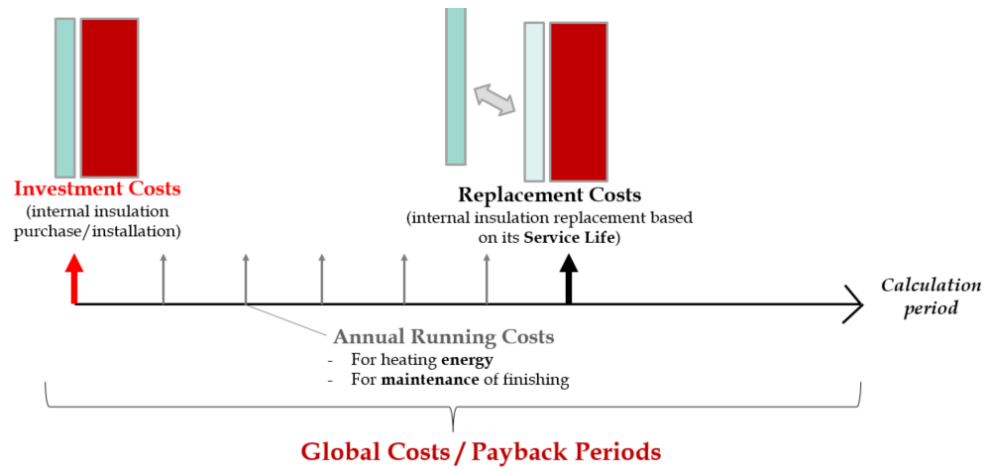

Figure 16 Schematic illustration of the cost categories included in the assessment

The energy cost (CE) is an annual cost for the energy use for heating, including national taxes. It is obtained multiplying the annual energy use by the tariff for the energy carrier considered (EnT). Since RIBuild focuses on the heating savings due to insulation options, the energy use concerned is that for *heating* ( $PE_H$ ) that depends on energy needed for heating expressed by the heat transmission loss through the wall ( $Q_H$ ) and the building overall efficiency for heating ( $ETA_H$ ), as reported in the following Eq. 10.

$$PE_H = \left( \frac{Q_H}{ETA_H} \right)$$

Eq. 10

The building global efficiency for heating ( $ETA_H$ ) and the energy tariff depend on the level knowledge of the building heating equipment and energy source typology. These parameters are related to specific national contexts.

The maintenance cost (CM) represents the cost for measures for preserving and restoring the desired quality of the building element (internal insulation). At the aim of the probabilistic LCC of interior insulations on historic buildings developed in RIBuild, the maintenance is considered as the need of periodic replacement of the internal finishing material, i.e. the rendering or the painting on the internal surface, which depends on these specific materials' estimated service life (or life span). Consistently with standard EN 15459, maintenance costs are then “yearly distributed” in order to obtain annual maintenance costs.

The replacement cost (CR) represents the substitute investment for the design option, according to the estimated economic lifecycle during the calculation period. It is a recurrent cost, with a frequency that depends on the Service Life (SL) of the insulation system concerned. The replacement cost is here considered equal to the investment cost necessary to replace the whole design option, discounted at the beginning of the calculation.

The LCC assessment can be performed in alternative future macro-economic scenarios<sup>12</sup>. Within each scenario, the variables entering the LCC calculation behave as stochastic variables and projections are generated as draws from appropriate probability distributions.

The quantitative expression of the scenarios is related to those (macro)economic variables affecting the life-cycle costs (either implicitly or explicitly). These variables are: Inflation rate; Interest rate;

<sup>12</sup> See section 3 of deliverable report D5.2 for further details.

GDP (Gross Domestic Product), Oil price (Crude oil, Brentd, nominal). Table 2 summarizes the macro-economic scenarios considered.

**Table 2 Alternative macro-economic scenarios, where “Regular growth” can be considered the baseline scenario and the respective long-term expected values (and variances) are indicated with “=” as they serve as reference for the alternative scenarios; ↑ means higher than the baseline; ↓ means lower than the baseline**

| <i>Variable:</i>                     |                |               |     |           |
|--------------------------------------|----------------|---------------|-----|-----------|
| <i>Scenario:</i>                     | Inflation rate | Interest rate | GDP | Oil price |
| <b>Regular growth<br/>(Baseline)</b> | =              | =             | =   | =         |
| <b>Intense growth</b>                | ↑              | ↑             | ↑   | ↑         |
| <b>Stagflation</b>                   | ↑              | =             | ↓   | ↑         |
| <b>Deflation</b>                     | ↓              | ↓             | ↓   | ↓         |

### Calculation equations included in the software model

The Global Cost ( $GC_{cp}$ ) at the end of the calculation period ( $cp$ ) referred to the starting year is calculated based on the method of standard EN 15459-1:2017 through the following Eq. 11:

$$GC_{cp} = \sum_{j=1}^N \left\{ CI_j + \sum_{t=1}^{CP} \left[ (CM_{j,t} * R_t^{disc} * R_t^L) + (CE_{j,t} * R_t^{disc} * R_t^E) \right] + CR_{j,t_j} - Val_{j,cp} \right\}$$

**Eq. 11**

where:

$t$  is the number of the year;

$j$  is the insulation system;

$cp$  is the calculation period;

$CI_j$  is the initial investment cost of the insulation system  $j$ ;

$CM_{j,t}$  is the annual maintenance cost of the insulation system  $j$ ;

$CE_{j,t}$  is the annual energy cost due to the insulation system  $j$ ;

$R_t^{disc}$  is the discount rate;

$R_t^L$  is the price development rate for human operation (labour cost);

$R_t^E$  is the price development rate for energy;

$CR_{j,t_j}$  is the replacement cost;

$Val_{j,cp}$  is the residual value of the insulation system at the end of the calculation period.

The frequency of the replacement cost  $CR_{j,t_j}$  depends on the service life  $SL_j$  of the insulation system concerned, as shown in Eq. 12

$$\left\{ CR_{j,t_j} = CI_j * R_{t_j}^{disc} * R_{t_j}^L, t_j = SL_j + 1, 2SL_j + 1, \dots, SL_j < cp \right\}$$

**Eq. 12**

The residual value of the insulation system  $Val_{j,cp}$  corresponds to the value of the system at the end of the calculation period. It is calculated based on a straight-line depreciation of the initial investment or replacement cost of the component until the end of the calculation, discounted at the beginning of the evaluation period, as shown in Eq. 13:

$$Val_{j,cp} = CI_j \left( \frac{r_j}{SL_j} \right) R_{cp}^{disc} R_{cp}^L$$

Eq. 13

where:

$$r_j = \left\{ SL_j \left[ \text{int} \left( \frac{cp - 1}{SL_j} \right) + 1 \right] \right\} - cp$$

Eq. 14

represents the remaining life span at the end of the calculation period of the last replacement of the system  $j$ , depending on the service life  $SL_j$  of the system concerned.

In the probabilistic methodology developed, the calculation of GC is “dynamic”, i.e. annual variations of the discount rate as well as annual variations of the price development rates of the annual costs (i.e. energy costs, periodic or replacement costs, maintenance costs) are considered.

The discount rate  $R_t^{disc}$  is a definite value for comparison of the value of money at different times expressed in real terms. It depends on the discount factor,  $d_t$ , which is a multiplicative number used to convert a cash flow occurring at a given point in time (year  $t$ ) to its equivalent value at the starting point [2]. The discount rate  $R_T^{disc}$  at any generic time period  $T$  is calculated as in Eq. 15:

$$R_T^{disc} = \prod_{t=1}^T \frac{1}{1 + d_t} = \frac{1}{1 + d_1} \frac{1}{1 + d_2} \dots \frac{1}{1 + d_T}$$

Eq. 15

The real discount factor,  $d_t$ , is a function of the inflation rate,  $\pi_t$ , and the nominal interest rate,  $i_t^N$ , according to Eq. 16.

$$d_t = \frac{i_t^N - \pi_t}{1 + \pi_t}$$

Eq. 16

Furthermore, the methodology includes the possibility of development over time of prices for energy and labour that can be different from the inflation rate.

Accordingly,  $R_T^L$  and  $R_T^E$  are the price development rates that are applied to all cost components of the LCC equation (i.e. energy costs, periodic or replacement costs, maintenance costs), defined according to Eq. 17:

$$R_T^L = \prod_{t=1}^T (1 + e_t^L) = (1 + e_1^L) (1 + e_2^L) \dots (1 + e_T^L)$$

$$R_T^E = \prod_{t=1}^T (1 + e_t^E) = (1 + e_1^E) (1 + e_2^E) \dots (1 + e_T^E)$$

Eq. 17

where:

$e_t^L$  is the escalation factor of the prices for human operation i.e. the growth rate of GDP (Gross Domestic Product) and it is computed in real terms as:

$$e_t^L = \frac{g_t^N - \pi_t}{1 + \pi_t}$$

Eq. 18

with  $g_t^N$  the nominal growth rate of GDP;

and  $e_t^E$  is the escalation factor of the prices for energy, i.e., the growth rate of crude oil price and it is computed in real terms as:

$$e_t^E = \frac{oilpg_t^N - \pi_t}{1 + \pi_t}$$

Eq. 19

where  $oilpg_t^N$  is the nominal growth rate of crude oil price.

The payback period (PB) is calculated as the number of years,  $S$ , required to the cumulative energy savings (Eq. 20) to equalize the initial investment costs and its subsequent operating costs (maintenance and replacement costs) (Eq. 21). The present value of operating-related savings and the present value of all other costs are considered, according to the following equations:

$$Savings = \sum_{t=1}^S \left\{ \left[ \left( \frac{Qh_{pre} - Qh_{post}}{ETA_H} \right) \right] EnT \right\} R_t^{disc} R_t^E$$

Eq. 20

$$Costs = \sum_{j=1}^N \left\{ CI_j + \sum_{t=1}^S \left[ \left( CM_{j,t} + CR_{j,t} \right) R_t^{disc} R_t^L \right] \right\}$$

Eq. 21

where:

$Qh_{pre}$  is the pre-renovation energy need, namely the heat transmission losses through the not-insulated wall;

$Qh_{post}$  is the post-renovation energy need, namely the heat transmission losses through the insulated wall.

The parameters included from Eq. 11 to Eq. 21 are summarized in Table 3.

**Table 3 Input parameters of the LCC included in the software tool**

| Input Parameter                                          | Symbol       | Unit                  |
|----------------------------------------------------------|--------------|-----------------------|
| Year                                                     | $t$          | [-]                   |
| (Insulation) System                                      | $j$          | [-]                   |
| Calculation Period                                       | $cp$         | [year]                |
| Initial investment cost of the system j (at time $t_0$ ) | $CI_j$       | €/m <sup>2</sup> or € |
| Maintenance cost for system j at the year t              | $CM_{j,t}$   | €/m <sup>2</sup> or € |
| Energy cost due to the system j at the year t            | $CE_{j,t}$   | €                     |
| Discount Rate (at the year t)                            | $R_t^{disc}$ | %                     |
| Inflation rate (at the year t)                           | $\pi_t$      | %                     |

|                                                                             |               |                                       |
|-----------------------------------------------------------------------------|---------------|---------------------------------------|
| Nominal interest rate (at the year $t$ )                                    | $i_t^N$       | %                                     |
| Price development rate for human operation (labour cost) (at the year $t$ ) | $R_t^L$       | %                                     |
| Price development rate for energy (for the year $t$ )                       | $R_t^E$       | %                                     |
| Real discount factor                                                        | $d_t$         | %                                     |
| Nominal growth rate of GDP                                                  | $g_t^N$       | %                                     |
| Nominal growth rate of crude oil price                                      | $oilpg_t^N$   | %                                     |
| Heat transmission losses through the wall during the heating period         | $Q_h$         | [kWh/year]                            |
| Overall building efficiency for heating                                     | $ETA_h$       | [-]                                   |
| Energy tariff                                                               | $EnT_{(c,e)}$ | $\left[ \frac{\text{€}}{kWh} \right]$ |
| Service Life for the System $j$                                             | $SL_j$        | [year]                                |
| Replacement cost for the System $j$ in the replacement year $t_j$           | $CR_{j,t_j}$  | €/m <sup>2</sup> or €                 |
| Replacement year                                                            | $t_j$         | [-]                                   |
| Final value of component $j$ at the calculation period $cp$                 | $Val_{j,cp}$  | €/m <sup>2</sup> or €                 |
| Residual years of the component $j$                                         | $r_j$         | [year]                                |
| Global Cost (corresponding to the calculation period $cp$ )                 | $GC_{cp}$     | €                                     |

## 1.4 Appendix 2. List of case studies included into the tool database

The RiBuildWP5 software database already contains some LCC and LCA data on insulation systems typically adopted in Europe for building renovation. These data are based on the following main references:

- Source A: Di Giuseppe et al. A Stochastic Approach to LCA of Internal Insulation Solutions for Historic Buildings, Sustainability. 12 (2020) 1535. doi:10.3390/su12041535;
- Source B: RiBuild Deliverable D5.1;
- Source C: RiBuild Sustainability WebTool.

The insulation systems from these references are described in the following tables.

### *Stratigraphy of insulation systems from source A*

**Table 4. Stratigraphy of the 5 Italian internal insulation layers from source A (outermost layer first), along with thermophysical properties of the most relevant materials and wall U-values obtained after the application of each insulation system on the considered masonry wall (including surface thermal resistances according to ISO 6946:2008).**

| Layer                                                                                                                                                                                                       | Material ID | Standard Thickness<br>[m] | Density<br>[kg/m <sup>3</sup> ] | Mass<br>[kg] | Thermal Conductivity<br>[W/mK] |
|-------------------------------------------------------------------------------------------------------------------------------------------------------------------------------------------------------------|-------------|---------------------------|---------------------------------|--------------|--------------------------------|
| “EPS” insulation system (Wall U-value = 0.349 W/m <sup>2</sup> K)<br>EPS insulating board fixed to the wall through an adhesive mortar, externally finished by plasterboard                                 |             |                           |                                 |              |                                |
| Gypsum adhesive mortar                                                                                                                                                                                      | 101         | 0.006                     | 1400                            | 3.50         | 0.400                          |
| EPS boards                                                                                                                                                                                                  | 102         | 0.080                     | 15                              | 1.26         | 0.035                          |
| Gypsum plasterboard                                                                                                                                                                                         | 103         | 0.0125                    | 680                             | 8.93         | 0.200                          |
| Stucco                                                                                                                                                                                                      | 101         | -                         | -                               | 0.40         | -                              |
| Gypsum finishing                                                                                                                                                                                            | 104         | 0.002                     | 950                             | 1.90         | 0.400                          |
| “CaSi” insulation system (Wall U-value = 0.359 W/m <sup>2</sup> K)<br>CaSi insulation board fixed to the wall through an adhesive mortar, externally finished with a reinforced multilayer rendering system |             |                           |                                 |              |                                |
| Adhesive mortar for CaSi                                                                                                                                                                                    | 105         | 0.006                     | 1450                            | 8.70         | 0.600                          |
| CaSi                                                                                                                                                                                                        | 106         | 0.130                     | 184                             | 23.92        | 0.059                          |
| Glass fiber mesh                                                                                                                                                                                            | 107         | -                         | -                               | 0.08         | -                              |
| Surface rendering for CaSi                                                                                                                                                                                  | 105         | 0.004                     | 1450                            | 5.80         | 0.0680                         |
| “AAC” insulation system (Wall U-value = 0.333 W/m <sup>2</sup> K)<br>AAC insulation board fixed to the wall through an adhesive mortar, externally finished with a reinforced multilayer rendering system   |             |                           |                                 |              |                                |
| Adhesive mortar for AAC                                                                                                                                                                                     | 105         | 0.006                     | 1450                            | 8.70         | 0.180                          |
| AAC                                                                                                                                                                                                         | 109         | 0.100                     | 90                              | 9.00         | 0.042                          |
| Surface rendering for AAC                                                                                                                                                                                   | 105         | 0.004                     | 1450                            | 5.80         | 0.180                          |
| “Cork” insulation system (Wall U-value = 0.339 W/m <sup>2</sup> K)<br>Cork insulation board fixed to the wall through an adhesive mortar, and plasterboard as an external layer                             |             |                           |                                 |              |                                |
| Gypsum adhesive mortar                                                                                                                                                                                      | 101         | 0.006                     | 1400                            | 3.50         | 0.400                          |
| Cork                                                                                                                                                                                                        | 110         | 0.090                     | 150                             | 10.80        | 0.039                          |
| Gypsum plasterboard                                                                                                                                                                                         | 103         | 0.0125                    | 680                             | 8.93         | 0.200                          |
| Stucco                                                                                                                                                                                                      | 101         | -                         | -                               | 0.40         | -                              |
| Gypsum finishing                                                                                                                                                                                            | 104         | 0.002                     | 950                             | 1.90         | 0.400                          |
| “RW” insulation system (Wall U-value = 0.322 W/m <sup>2</sup> K)                                                                                                                                            |             |                           |                                 |              |                                |



| Rockwool insulating board fixed to the wall through a metallic frame with vapor barrier and two plasterboards as an external layer |     |       |      |       |                    |
|------------------------------------------------------------------------------------------------------------------------------------|-----|-------|------|-------|--------------------|
| Rockwool                                                                                                                           | 111 | 0.08  | 18   | 1.44  | 0.035              |
| Air gap                                                                                                                            | -   | 0.02  | 1.23 | -     | 5.423 <sup>1</sup> |
| Steel C-profiles                                                                                                                   | 112 | -     | 7800 | 0.84  | -                  |
| Steel U-profiles                                                                                                                   | 112 | -     | 7800 | 1.97  | -                  |
| Gypsum plasterboards                                                                                                               | 103 | 0.025 | 680  | 17.86 | 0.200              |
| Aluminum vapor barrier                                                                                                             | 113 | -     | -    | 0.08  | -                  |
| Steel screws                                                                                                                       | 112 | -     | -    | 0.08  | -                  |
| Stucco                                                                                                                             | 101 | -     | -    | 0.40  | -                  |
| Gypsum finishing                                                                                                                   | 104 | 0.002 | 950  | 1.90  | 0.400              |

<sup>1</sup> Conductance value [W/m²K].

### Stratigraphy of insulation systems from source B

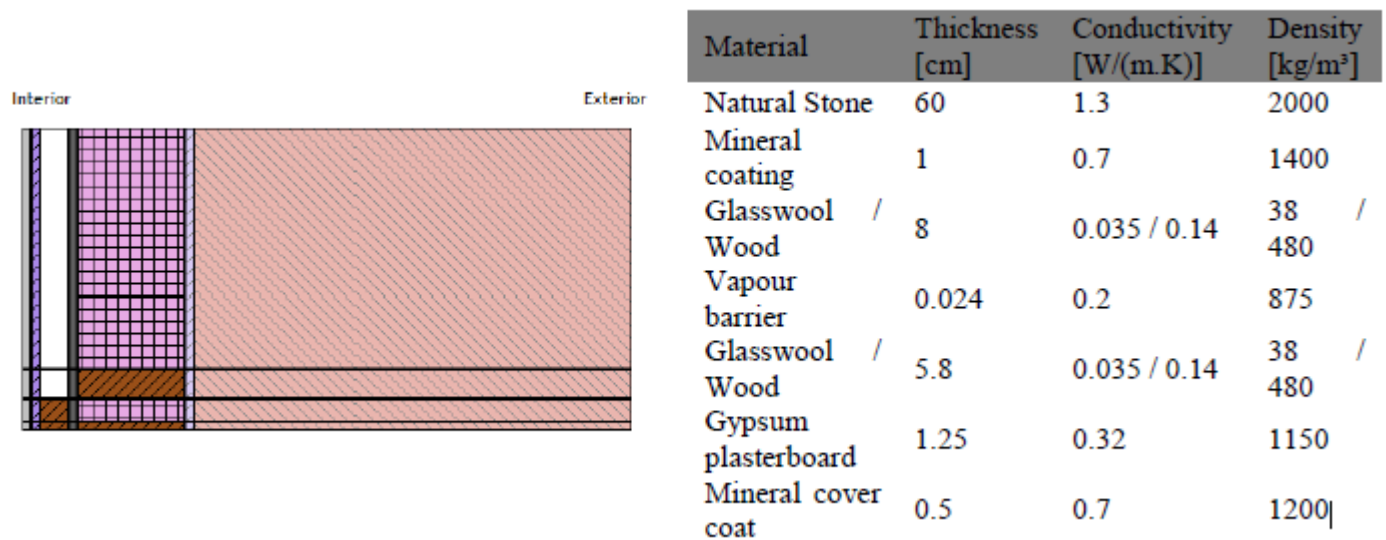

Figure 17. Stratigraphy of insulation systems n.6 (Rockwool). From RibuildD5.1.

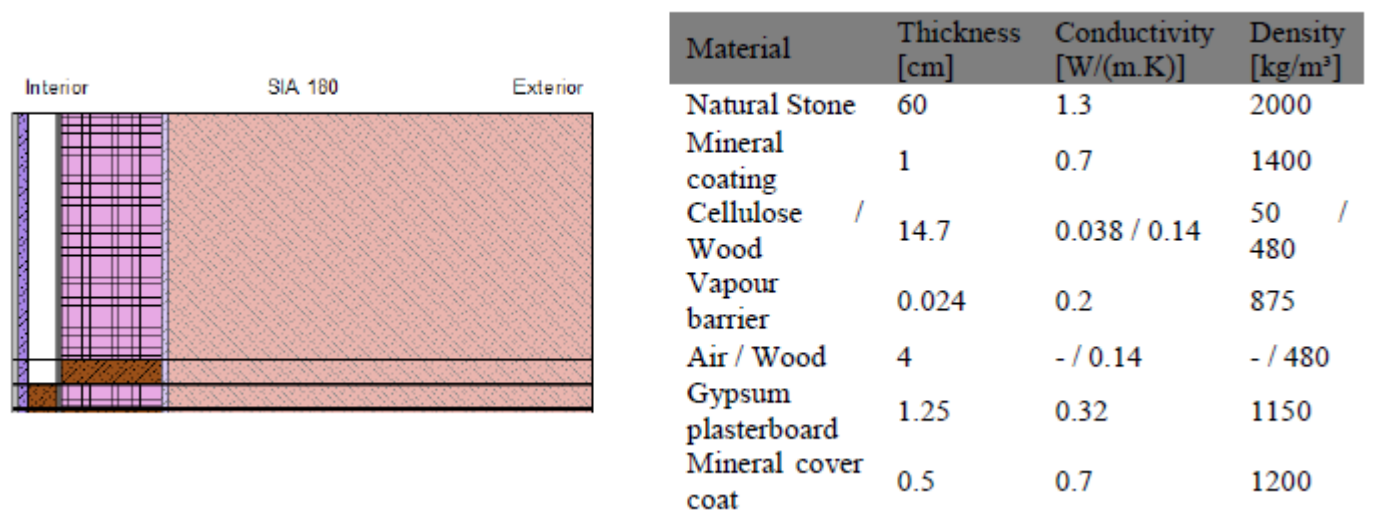

Figure 18. Stratigraphy of insulation systems n.7 (Cellulose). From RibuildD5.1.

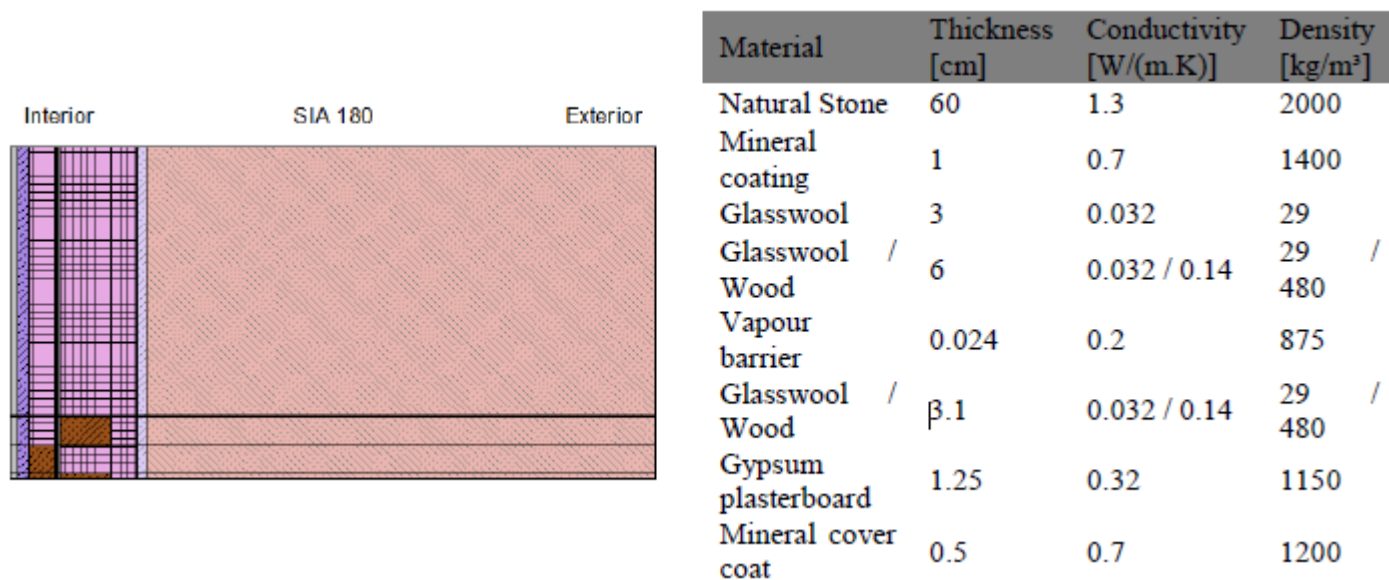

Figure 19. Stratigraphy of insulation systems n.8 (Glass Wool). From RibuildD5.1.

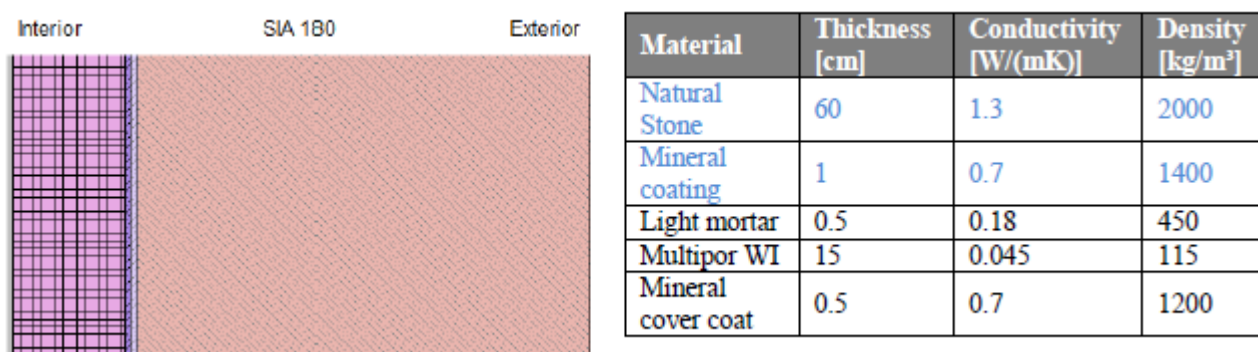

Figure 20. Stratigraphy of insulation systems n.9 (AAC). From RibuildD5.1.

Table 19 Insulation systems B and C

| Insulation system               | Material Layers            | Thickness [m] | Density [kg/m³] |  |
|---------------------------------|----------------------------|---------------|-----------------|--|
| B -MicroTherm insulation system | Microtherm climate panel   | 0.15          | 500             |  |
|                                 | Inorganic adhesive plaster | 0.005         | 1350            |  |
|                                 | Putty                      | 0.005         | 1400            |  |
| C -iQ-Therm insulation system   | iQ-Therm board             | 0.08          | 45              |  |
|                                 | iQ-Fix adhesive            | 0.005         | 1500            |  |
|                                 | iQ-Top                     | 0.005         | 630             |  |
|                                 | iQ-Fill                    | 0.003         | 1200            |  |
|                                 | Pimer + Paint              | 0.003         | 1200            |  |

Figure 21. Stratigraphy of insulation systems n.10 (B) and 11 (C). From RibuildD5.1.

## *Insulation systems from source C*

**Table 5. “CaSi” insulation system stratigraphies from source C.**

| Product name                      | Thickness<br>[m] |
|-----------------------------------|------------------|
| Calsitherm KP inside lime plaster | 0.01             |
| ClimateBoard                      | 0.025            |
| Calsitherm KP Glue Mortar         | 0.005            |
| Calsitherm KP inside lime plaster | 0.01             |
| ClimateBoard                      | 0.03             |
| Calsitherm KP Glue Mortar         | 0.005            |
| Calsitherm KP inside lime plaster | 0.01             |
| ClimateBoard                      | 0.05             |
| Calsitherm KP Glue Mortar         | 0.005            |
| Calsitherm KP inside lime plaster | 0.01             |
| ClimateBoard                      | 0.08             |
| Calsitherm KP Glue Mortar         | 0.005            |

**Table 6. “Capillary-active PUR” insulation system stratigraphies from source C.**

| Product name | Thickness<br>[m] |
|--------------|------------------|
| iQ-Top       | 0.01             |
| iQ-Therm     | 0.03             |
| iQ-Fix       | 0.008            |
| iQ-Top       | 0.01             |
| iQ-Therm     | 0.05             |
| iQ-Fix       | 0.008            |
| iQ-Top       | 0.01             |
| iQ-Therm     | 0.08             |
| iQ-Fix       | 0.008            |

**Table 7. “Phenolic Foam” insulation system stratigraphies from source C.**

| Product name                | Thickness<br>[m] |
|-----------------------------|------------------|
| PhenolicFoam                | 0.02             |
| Gypsum Board Knauf Standard | 0.0125           |
| PhenolicFoam                | 0.045            |
| Gypsum Board Knauf Standard | 0.0125           |

|                             |        |
|-----------------------------|--------|
| PhenolicFoam                | 0.065  |
| Gypsum Board Knauf Standard | 0.0125 |
| PhenolicFoam                | 0.08   |
| Gypsum Board Knauf Standard | 0.0125 |
| PhenolicFoam                | 0.9    |
| Gypsum Board Knauf Standard | 0.0125 |
| PhenolicFoam                | 0.11   |
| Gypsum Board Knauf Standard | 0.0125 |

**Table 8. “AAC” insulation system stratigraphies from source C.**

| Product name         | Thickness<br>[m] |
|----------------------|------------------|
| Climate plaster      | 0.01             |
| MineralFoamMulltipor | 0.06             |
| Glue Mortar          | 0.005            |
| Climate plaster      | 0.01             |
| MineralFoamMulltipor | 0.08             |
| Glue Mortar          | 0.005            |
| Climate plaster      | 0.01             |
| MineralFoamMulltipor | 0.1              |
| Glue Mortar          | 0.005            |

**Table 9. “Mineral Wool” insulation system stratigraphies from source C.**

| Product name                  | Thickness<br>[m] |
|-------------------------------|------------------|
| Vapour barrier Isover PBM 032 | 0.00022          |
| Isover MineralWool32          | 0.7              |
| Air                           | 0.022            |
| Gypsum Board Knauf Standard   | 0.0125           |
| Vapour barrier Isover PBM 032 | 0.00022          |
| Isover MineralWool32          | 0.95             |
| Air                           | 0.022            |
| Gypsum Board Knauf Standard   | 0.0125           |
| Vapour barrier Isover PBM 032 | 0.00022          |
| Isover MineralWool32          | 1.2              |
| Air                           | 0.022            |
| Gypsum Board Knauf Standard   | 0.0125           |

The materials, insulation systems, case study and energy sources contained in the database are summarized in the following.

## Materials

**Table 10. Summary table of materials included in the RiBuild software database.**

| Material ID | Name                                         | Country     | Source | LCA Method | Data type                    |
|-------------|----------------------------------------------|-------------|--------|------------|------------------------------|
| 101         | Stucco ITA                                   | Italy       | A      | CML        | Stochastic                   |
| 102         | EPS boards ITA                               | Italy       | A      | CML        | Stochastic                   |
| 103         | Gypsum Plasterboard ITA                      | Italy       | A      | CML        | Stochastic                   |
| 104         | Gypsum finishing ITA                         | Italy       | A      | CML        | Stochastic                   |
| 105         | Adhesive mortar ITA                          | Italy       | A      | CML        | Stochastic                   |
| 106         | CaSi ITA                                     | Italy       | A      | CML        | Stochastic                   |
| 107         | Glass fiber mesh ITA                         | Italy       | A      | CML        | Stochastic                   |
| 108         | Water-based paint ITA                        | Italy       | A      | CML        | Stochastic                   |
| 109         | Aerate Autoclaved Concrete (AAC) ITA         | Italy       | A      | CML        | Stochastic                   |
| 110         | Cork ITA                                     | Italy       | A      | CML        | Stochastic                   |
| 111         | Rockwool ITA                                 | Italy       | A      | CML        | Stochastic                   |
| 112         | Metalic frame ITA                            | Italy       | A      | CML        | Stochastic                   |
| 113         | Alluminum vapor barrier ITA                  | Italy       | A      | CML        | Stochastic                   |
| 201         | Mineral plaster                              | Switzerland | B      | RECIPE     | Deterministic                |
| 202         | Fermacell gypsum fibreboard                  | Switzerland | B      | RECIPE     | Deterministic                |
| 203         | GYSO VS 80 R vapour barrier                  | Switzerland | B      | RECIPE     | Deterministic                |
| 204         | Glasswool Isover PB M 032                    | Switzerland | B      | RECIPE     | Deterministic                |
| 205         | Softwood                                     | Switzerland | B      | RECIPE     | Deterministic                |
| 206         | Rockwool Flumroc 1                           | Switzerland | B      | RECIPE     | Deterministic                |
| 207         | Multipor WI insulation                       | Switzerland | B      | RECIPE     | Deterministic                |
| 208         | Isofloc LM                                   | Switzerland | B      | RECIPE     | Deterministic                |
| 209         | Multipor light mortar                        | Switzerland | B      | RECIPE     | Deterministic                |
| 301         | Isover glasswool rolls (lambda 37)           | Denmark     | B      | RECIPE     | Deterministic and stochastic |
| 302         | Isover Steel frame (stud)                    | Denmark     | B      | RECIPE     | Deterministic and stochastic |
| 303         | Flexibatts 37 rockwool                       | Denmark     | B      | RECIPE     | Deterministic and stochastic |
| 304         | OSB-3 board                                  | Denmark     | B      | RECIPE     | Deterministic and stochastic |
| 305         | Rockwool vapour barrier (plastic PE foil)    | Denmark     | B      | RECIPE     | Deterministic and stochastic |
| 306         | Gypsum plasterboard                          | Denmark     | B      | RECIPE     | Deterministic and stochastic |
| 307         | PROMALUX-V calsium silicate boards           | Denmark     | B      | RECIPE     | Deterministic and stochastic |
| 308         | Micro dispers (acrylic primer+paint)         | Denmark     | B      | RECIPE     | Deterministic and stochastic |
| 309         | Sodium Silicate - Inorganic adhesive plaster | Denmark     | B      | RECIPE     | Deterministic and stochastic |

| Material ID | Name                                                           | Country | Source | LCA Method | Data type                    |
|-------------|----------------------------------------------------------------|---------|--------|------------|------------------------------|
| 310         | DalaPro Nova sandspartel (putty)                               | Denmark | B      | RECIPE     | Deterministic and stochastic |
| 311         | CalsiTherm climate board (replaced by promalux-v)              | Denmark | B      | RECIPE     | Deterministic and stochastic |
| 312         | Adhesive mortar                                                | Denmark | B      | RECIPE     | Deterministic and stochastic |
| 313         | Ytong multipor board                                           | Denmark | B      | RECIPE     | Deterministic and stochastic |
| 314         | Ytong lightmortar                                              | Denmark | B      | RECIPE     | Deterministic and stochastic |
| 315         | Kingspan KoolTherm K118 plaster board (replaced by foam board) | Denmark | B      | RECIPE     | Deterministic and stochastic |
| 316         | iQ-Therm board (replaced by foam board)                        | Denmark | B      | RECIPE     | Deterministic and stochastic |
| 317         | iQ-Fix adhesive (replaced by inorganic adhesives)              | Denmark | B      | RECIPE     | Deterministic and stochastic |
| 318         | iQ-Top (replaced by gypsum plaster)                            | Denmark | B      | RECIPE     | Deterministic and stochastic |
| 319         | iQ-Fill (putty) (inorganic adhesive)                           | Denmark | B      | RECIPE     | Deterministic and stochastic |
| 320         | Pimer + Paint                                                  | Denmark | B      | RECIPE     | Deterministic and stochastic |
| 401         | Inside lime plaster for CaSi                                   | Denmark | C      | CML        | Deterministic                |
| 402         | CaSi                                                           | Denmark | C      | CML        | Deterministic                |
| 403         | Glue Mortar for CaSi                                           | Denmark | C      | CML        | Deterministic                |
| 404         | Inside plaster for capillary-active PUR                        | Denmark | C      | CML        | Deterministic                |
| 405         | Capillary-active PUR                                           | Denmark | C      | CML        | Deterministic                |
| 406         | Glue mortar for capillary-active PUR                           | Denmark | C      | CML        | Deterministic                |
| 407         | Phenolic Foam                                                  | Denmark | C      | CML        | Deterministic                |
| 408         | Gypsum Board                                                   | Denmark | C      | CML        | Deterministic                |
| 409         | Aerate Autoclaved Concrete (AAC)                               | Denmark | C      | CML        | Deterministic                |
| 410         | Polypropylene Vapour barrier                                   | Denmark | C      | CML        | Deterministic                |
| 411         | Glasswool                                                      | Denmark | C      | CML        | Deterministic                |
| 501         | Inside lime plaster for CaSi                                   | Sweden  | C      | CML        | Deterministic                |
| 502         | CaSi                                                           | Sweden  | C      | CML        | Deterministic                |
| 503         | Glue Mortar for CaSi                                           | Sweden  | C      | CML        | Deterministic                |
| 504         | Inside plaster for capillary-active PUR                        | Sweden  | C      | CML        | Deterministic                |
| 505         | Capillary-active PUR                                           | Sweden  | C      | CML        | Deterministic                |
| 506         | Glue mortar for capillary-active PUR                           | Sweden  | C      | CML        | Deterministic                |
| 507         | Phenolic Foam                                                  | Sweden  | C      | CML        | Deterministic                |
| 508         | Gypsum Board                                                   | Sweden  | C      | CML        | Deterministic                |
| 509         | Aerate Autoclaved Concrete (AAC)                               | Sweden  | C      | CML        | Deterministic                |
| 510         | Polypropylene Vapour barrier                                   | Sweden  | C      | CML        | Deterministic                |
| 511         | Glasswool                                                      | Sweden  | C      | CML        | Deterministic                |
| 601         | Inside lime plaster for CaSi                                   | Latvia  | C      | CML        | Deterministic                |
| 602         | CaSi                                                           | Latvia  | C      | CML        | Deterministic                |
| 603         | Glue Mortar for CaSi                                           | Latvia  | C      | CML        | Deterministic                |
| 604         | Inside plaster for capillary-active PUR                        | Latvia  | C      | CML        | Deterministic                |
| 605         | Capillary-active PUR                                           | Latvia  | C      | CML        | Deterministic                |

| Material ID | Name                                    | Country     | Source | LCA Method | Data type     |
|-------------|-----------------------------------------|-------------|--------|------------|---------------|
| 606         | Glue mortar for capillary-active PUR    | Latvia      | C      | CML        | Deterministic |
| 607         | Phenolic Foam                           | Latvia      | C      | CML        | Deterministic |
| 608         | Gypsum Board                            | Latvia      | C      | CML        | Deterministic |
| 609         | Aerate Autoclaved Concrete (AAC)        | Latvia      | C      | CML        | Deterministic |
| 610         | Polypropylene Vapour barrier            | Latvia      | C      | CML        | Deterministic |
| 611         | Glasswool                               | Latvia      | C      | CML        | Deterministic |
| 701         | Inside lime plaster for CaSi            | Switzerland | C      | CML        | Deterministic |
| 702         | CaSi                                    | Switzerland | C      | CML        | Deterministic |
| 703         | Glue Mortar for CaSi                    | Switzerland | C      | CML        | Deterministic |
| 704         | Inside plaster for capillary-active PUR | Switzerland | C      | CML        | Deterministic |
| 705         | Capillary-active PUR                    | Switzerland | C      | CML        | Deterministic |
| 706         | Glue mortar for capillary-active PUR    | Switzerland | C      | CML        | Deterministic |
| 707         | Phenolic Foam                           | Switzerland | C      | CML        | Deterministic |
| 708         | Gypsum Board                            | Switzerland | C      | CML        | Deterministic |
| 709         | Aerate Autoclaved Concrete (AAC)        | Switzerland | C      | CML        | Deterministic |
| 710         | Polypropylene Vapour barrier            | Switzerland | C      | CML        | Deterministic |
| 711         | Glasswool                               | Switzerland | C      | CML        | Deterministic |
| 801         | Inside lime plaster for CaSi            | Germany     | C      | CML        | Deterministic |
| 802         | CaSi                                    | Germany     | C      | CML        | Deterministic |
| 803         | Glue Mortar for CaSi                    | Germany     | C      | CML        | Deterministic |
| 804         | Inside plaster for capillary-active PUR | Germany     | C      | CML        | Deterministic |
| 805         | Capillary-active PUR                    | Germany     | C      | CML        | Deterministic |
| 806         | Glue mortar for capillary-active PUR    | Germany     | C      | CML        | Deterministic |
| 807         | Phenolic Foam                           | Germany     | C      | CML        | Deterministic |
| 808         | Gypsum Board                            | Germany     | C      | CML        | Deterministic |
| 809         | Aerate Autoclaved Concrete (AAC)        | Germany     | C      | CML        | Deterministic |
| 810         | Polypropylene Vapour barrier            | Germany     | C      | CML        | Deterministic |
| 811         | Glasswool                               | Germany     | C      | CML        | Deterministic |
| 901         | Inside lime plaster for CaSi            | Belgium     | C      | CML        | Deterministic |
| 902         | CaSi                                    | Belgium     | C      | CML        | Deterministic |
| 903         | Glue Mortar for CaSi                    | Belgium     | C      | CML        | Deterministic |
| 904         | Inside plaster for capillary-active PUR | Belgium     | C      | CML        | Deterministic |
| 905         | Capillary-active PUR                    | Belgium     | C      | CML        | Deterministic |
| 906         | Glue mortar for capillary-active PUR    | Belgium     | C      | CML        | Deterministic |
| 907         | Phenolic Foam                           | Belgium     | C      | CML        | Deterministic |
| 908         | Gypsum Board                            | Belgium     | C      | CML        | Deterministic |
| 909         | Aerate Autoclaved Concrete (AAC)        | Belgium     | C      | CML        | Deterministic |
| 910         | Polypropylene Vapour barrier            | Belgium     | C      | CML        | Deterministic |
| 911         | Glasswool                               | Belgium     | C      | CML        | Deterministic |
| 1001        | Inside lime plaster for CaSi            | Italy       | C      | CML        | Deterministic |
| 1002        | CaSi                                    | Italy       | C      | CML        | Deterministic |
| 1003        | Glue Mortar for CaSi                    | Italy       | C      | CML        | Deterministic |
| 1004        | Inside plaster for capillary-active PUR | Italy       | C      | CML        | Deterministic |



| Material ID | Name                                 | Country | Source | LCA Method | Data type     |
|-------------|--------------------------------------|---------|--------|------------|---------------|
| 1005        | Capillary-active PUR                 | Italy   | C      | CML        | Deterministic |
| 1006        | Glue mortar for capillary-active PUR | Italy   | C      | CML        | Deterministic |
| 1007        | Phenolic Foam                        | Italy   | C      | CML        | Deterministic |
| 1008        | Gypsum Board                         | Italy   | C      | CML        | Deterministic |
| 1009        | Aerate Autoclaved Concrete (AAC)     | Italy   | C      | CML        | Deterministic |
| 1010        | Polypropylene Vapour barrier         | Italy   | C      | CML        | Deterministic |
| 1011        | Glasswool                            | Italy   | C      | CML        | Deterministic |

### *Insulation systems/Case studies*

**Table 11. Summary table of insulation systems and case studies included in the RiBuild software database. IS: Insulation system. CS: Case study. \*LCC data estimated, to be verified in the national context and real application**

| IS / CS ID | Source | Country | IS                   | Materials included ID                | Insulation thickness (m) | Existing wall thermal resistance (m <sup>2</sup> K/W) | Insulation system thermal resistance (m <sup>2</sup> K/W) | Climate               | LCC data* | Data type                    |
|------------|--------|---------|----------------------|--------------------------------------|--------------------------|-------------------------------------------------------|-----------------------------------------------------------|-----------------------|-----------|------------------------------|
| 1          | A      | IT      | EPS                  | 101 102<br>103 104                   | 0.08                     | 0.4                                                   | 2.297                                                     | Lombardia Region (IT) | X         | Stochastic                   |
| 2          | A      | IT      | CaSi                 | 105 106<br>107                       | 0.13                     | 0.4                                                   | 2.218                                                     | Lombardia Region (IT) | X         | Stochastic                   |
| 3          | A      | IT      | AAC                  | 105 109                              | 0.1                      | 0.4                                                   | 2.435                                                     | Lombardia Region (IT) | X         | Stochastic                   |
| 4          | A      | IT      | Cork                 | 101 110<br>103 104<br>111 112        | 0.09                     | 0.4                                                   | 2.382                                                     | Lombardia Region (IT) | X         | Stochastic                   |
| 5          | A      | IT      | Rockwool             | 103 113<br>101 104<br>201 202        | 0.08                     | 0.4                                                   | 2.538                                                     | Lombardia Region (IT) | X         | Stochastic                   |
| 6          | B      | CH      | Rockwool             | 206 205<br>203 206<br>205<br>201 202 | 0.14                     | 0.77                                                  | 3.509                                                     | CH                    | -         | Deterministic                |
| 7          | B      | CH      | Cellulose            | 205 203<br>208 205<br>201 202        | 0.15                     | 0.77                                                  | 3.472                                                     | CH                    | -         | Deterministic                |
| 8          | B      | CH      | Glass Wool           | 204 205<br>203 204<br>205 204        | 0.12                     | 0.77                                                  | 3.509                                                     | CH                    | -         | Deterministic                |
| 9          | B      | CH      | AAC                  | 201 207<br>209                       | 0.15                     | 0.77                                                  | 3.533                                                     | CH                    | -         | Deterministic                |
| 10         | B      | DK      | CaSi                 | 307 309<br>310                       | 0.15                     | 0.261                                                 | 2.31                                                      | Copenhagen            | -         | Deterministic and stochastic |
| 11         | B      | DK      | Capillary Active PUR | 316 317<br>318 319<br>320            | 0.08                     | 0.261                                                 | 2.60                                                      | Copenhagen            | -         | Deterministic and stochastic |
| 12         | C      | DK      | CaSi                 | 401 402<br>403                       | 0.025                    | 0.5                                                   | 0.45                                                      | DK                    | X         | Deterministic                |
| 13         | C      | DK      | CaSi                 | 401 402<br>403                       | 0.03                     | 0.5                                                   | 0.53                                                      | DK                    | X         | Deterministic                |
| 14         | C      | DK      | CaSi                 | 401 402<br>403                       | 0.05                     | 0.5                                                   | 0.87                                                      | DK                    | X         | Deterministic                |
| 15         | C      | DK      | CaSi                 | 401 402<br>403                       | 0.08                     | 0.5                                                   | 1.38                                                      | DK                    | X         | Deterministic                |
| 16         | C      | DK      | Capillary Active PUR | 404 405<br>406                       | 0.03                     | 0.5                                                   | 1.07                                                      | DK                    | X         | Deterministic                |

| IS /<br>CS<br>ID | Source | Country | IS                         | Materials<br>included<br>ID | Insulation<br>thickness<br>(m) | Existing<br>wall<br>thermal<br>resistance<br>(m <sup>2</sup> K/W) | Insulation<br>system<br>thermal<br>resistance<br>(m <sup>2</sup> K/W) | Climate | LCC<br>data* | Data type     |
|------------------|--------|---------|----------------------------|-----------------------------|--------------------------------|-------------------------------------------------------------------|-----------------------------------------------------------------------|---------|--------------|---------------|
| 17               | C      | DK      | Capillary<br>Active<br>PUR | 404 405<br>406              | 0.05                           | 0.5                                                               | 1.72                                                                  | DK      | X            | Deterministic |
| 18               | C      | DK      | Capillary<br>Active<br>PUR | 404 405<br>406              | 0.08                           | 0.5                                                               | 2.69                                                                  | DK      | X            | Deterministic |
| 19               | C      | DK      | Phenolic<br>Foam           | 407 408                     | 0.02                           | 0.5                                                               | 1.16                                                                  | DK      | X            | Deterministic |
| 20               | C      | DK      | Phenolic<br>Foam           | 407 408                     | 0.045                          | 0.5                                                               | 2.55                                                                  | DK      | -            | Deterministic |
| 21               | C      | DK      | Phenolic<br>Foam           | 407 408                     | 0.065                          | 0.5                                                               | 3.66                                                                  | DK      | -            | Deterministic |
| 22               | C      | DK      | Phenolic<br>Foam           | 407 408                     | 0.08                           | 0.5                                                               | 4.49                                                                  | DK      | -            | Deterministic |
| 23               | C      | DK      | Phenolic<br>Foam           | 407 408                     | 0.09                           | 0.5                                                               | 5.05                                                                  | DK      | -            | Deterministic |
| 24               | C      | DK      | Phenolic<br>Foam           | 407 408                     | 0.11                           | 0.5                                                               | 6.16                                                                  | DK      | -            | Deterministic |
| 25               | C      | DK      | AAC                        | 401 409<br>403              | 0.06                           | 0.5                                                               | 1.36                                                                  | DK      | X            | Deterministic |
| 26               | C      | DK      | AAC                        | 401 409<br>403              | 0.08                           | 0.5                                                               | 1.8                                                                   | DK      | X            | Deterministic |
| 27               | C      | DK      | AAC                        | 401 409<br>403              | 0.1                            | 0.5                                                               | 2.25                                                                  | DK      | X            | Deterministic |
| 28               | C      | DK      | Glass<br>Wool              | 410 411<br>408              | 0.07                           | 0.5                                                               | 2.24                                                                  | DK      | -            | Deterministic |
| 29               | C      | DK      | Glass<br>Wool              | 410 411<br>408              | 0.095                          | 0.5                                                               | 3.02                                                                  | DK      | -            | Deterministic |
| 30               | C      | DK      | Glass<br>Wool              | 410 411<br>408              | 0.12                           | 0.5                                                               | 3.8                                                                   | DK      | -            | Deterministic |
| 31               | C      | SE      | CaSi                       | 501 502<br>503              | 0.025                          | 0.5                                                               | 0.45                                                                  | SE      | X            | Deterministic |
| 32               | C      | SE      | CaSi                       | 501 502<br>503              | 0.03                           | 0.5                                                               | 0.53                                                                  | SE      | X            | Deterministic |
| 33               | C      | SE      | CaSi                       | 501 502<br>503              | 0.05                           | 0.5                                                               | 0.87                                                                  | SE      | X            | Deterministic |
| 34               | C      | SE      | CaSi                       | 501 502<br>503              | 0.08                           | 0.5                                                               | 1.38                                                                  | SE      | X            | Deterministic |
| 35               | C      | SE      | Capillary<br>Active<br>PUR | 504 505<br>506              | 0.03                           | 0.5                                                               | 1.07                                                                  | SE      | X            | Deterministic |
| 36               | C      | SE      | Capillary<br>Active<br>PUR | 504 505<br>506              | 0.05                           | 0.5                                                               | 1.72                                                                  | SE      | X            | Deterministic |
| 37               | C      | SE      | Capillary<br>Active<br>PUR | 504 505<br>506              | 0.08                           | 0.5                                                               | 2.69                                                                  | SE      | X            | Deterministic |
| 38               | C      | SE      | Phenolic<br>Foam           | 507 508                     | 0.02                           | 0.5                                                               | 1.16                                                                  | SE      | X            | Deterministic |
| 39               | C      | SE      | Phenolic<br>Foam           | 507 508                     | 0.045                          | 0.5                                                               | 2.55                                                                  | SE      | -            | Deterministic |
| 40               | C      | SE      | Phenolic<br>Foam           | 507 508                     | 0.065                          | 0.5                                                               | 3.66                                                                  | SE      | -            | Deterministic |
| 41               | C      | SE      | Phenolic<br>Foam           | 507 508                     | 0.08                           | 0.5                                                               | 4.49                                                                  | SE      | -            | Deterministic |
| 42               | C      | SE      | Phenolic<br>Foam           | 507 508                     | 0.09                           | 0.5                                                               | 5.05                                                                  | SE      | -            | Deterministic |
| 43               | C      | SE      | Phenolic<br>Foam           | 507 508                     | 0.11                           | 0.5                                                               | 6.16                                                                  | SE      | -            | Deterministic |
| 44               | C      | SE      | AAC                        | 501 509<br>503              | 0.06                           | 0.5                                                               | 1.36                                                                  | SE      | X            | Deterministic |
| 45               | C      | SE      | AAC                        | 501 509<br>503              | 0.08                           | 0.5                                                               | 1.8                                                                   | SE      | X            | Deterministic |
| 46               | C      | SE      | AAC                        | 501 509<br>503              | 0.1                            | 0.5                                                               | 2.25                                                                  | SE      | X            | Deterministic |

| IS /<br>CS<br>ID | Source | Country | IS                         | Materials<br>included<br>ID | Insulation<br>thickness<br>(m) | Existing<br>wall<br>thermal<br>resistance<br>(m <sup>2</sup> K/W) | Insulation<br>system<br>thermal<br>resistance<br>(m <sup>2</sup> K/W) | Climate | LCC<br>data* | Data type     |
|------------------|--------|---------|----------------------------|-----------------------------|--------------------------------|-------------------------------------------------------------------|-----------------------------------------------------------------------|---------|--------------|---------------|
| 47               | C      | SE      | Glass<br>Wool              | 510 511<br>508              | 0.07                           | 0.5                                                               | 2.24                                                                  | SE      | -            | Deterministic |
| 48               | C      | SE      | Glass<br>Wool              | 510 511<br>508              | 0.095                          | 0.5                                                               | 3.02                                                                  | SE      | -            | Deterministic |
| 49               | C      | SE      | Glass<br>Wool              | 510 511<br>508              | 0.12                           | 0.5                                                               | 3.8                                                                   | SE      | -            | Deterministic |
| 50               | C      | LT      | CaSi                       | 601 602<br>603              | 0.025                          | 0.5                                                               | 0.45                                                                  | LT      | X            | Deterministic |
| 51               | C      | LT      | CaSi                       | 601 602<br>603              | 0.03                           | 0.5                                                               | 0.53                                                                  | LT      | X            | Deterministic |
| 52               | C      | LT      | CaSi                       | 601 602<br>603              | 0.05                           | 0.5                                                               | 0.87                                                                  | LT      | X            | Deterministic |
| 53               | C      | LT      | CaSi                       | 601 602<br>603              | 0.08                           | 0.5                                                               | 1.38                                                                  | LT      | X            | Deterministic |
| 54               | C      | LT      | Capillary<br>Active<br>PUR | 604 605<br>606              | 0.03                           | 0.5                                                               | 1.07                                                                  | LT      | X            | Deterministic |
| 55               | C      | LT      | Capillary<br>Active<br>PUR | 604 605<br>606              | 0.05                           | 0.5                                                               | 1.72                                                                  | LT      | X            | Deterministic |
| 56               | C      | LT      | Capillary<br>Active<br>PUR | 604 605<br>606              | 0.08                           | 0.5                                                               | 2.69                                                                  | LT      | X            | Deterministic |
| 57               | C      | LT      | Phenolic<br>Foam           | 607 608                     | 0.02                           | 0.5                                                               | 1.16                                                                  | LT      | X            | Deterministic |
| 58               | C      | LT      | Phenolic<br>Foam           | 607 608                     | 0.045                          | 0.5                                                               | 2.55                                                                  | LT      | -            | Deterministic |
| 59               | C      | LT      | Phenolic<br>Foam           | 607 608                     | 0.065                          | 0.5                                                               | 3.66                                                                  | LT      | -            | Deterministic |
| 60               | C      | LT      | Phenolic<br>Foam           | 607 608                     | 0.08                           | 0.5                                                               | 4.49                                                                  | LT      | -            | Deterministic |
| 61               | C      | LT      | Phenolic<br>Foam           | 607 608                     | 0.09                           | 0.5                                                               | 5.05                                                                  | LT      | -            | Deterministic |
| 62               | C      | LT      | Phenolic<br>Foam           | 607 608                     | 0.11                           | 0.5                                                               | 6.16                                                                  | LT      | -            | Deterministic |
| 63               | C      | LT      | AAC                        | 601 609<br>603              | 0.06                           | 0.5                                                               | 1.36                                                                  | LT      | X            | Deterministic |
| 64               | C      | LT      | AAC                        | 601 609<br>603              | 0.08                           | 0.5                                                               | 1.8                                                                   | LT      | X            | Deterministic |
| 65               | C      | LT      | AAC                        | 601 609<br>603              | 0.1                            | 0.5                                                               | 2.25                                                                  | LT      | X            | Deterministic |
| 66               | C      | LT      | Glass<br>Wool              | 610 611<br>608              | 0.07                           | 0.5                                                               | 2.24                                                                  | LT      | -            | Deterministic |
| 67               | C      | LT      | Glass<br>Wool              | 610 611<br>608              | 0.095                          | 0.5                                                               | 3.02                                                                  | LT      | -            | Deterministic |
| 68               | C      | LT      | Glass<br>Wool              | 610 611<br>608              | 0.12                           | 0.5                                                               | 3.8                                                                   | LT      | -            | Deterministic |
| 69               | C      | CH      | CaSi                       | 701 702<br>703              | 0.025                          | 0.5                                                               | 0.45                                                                  | CH      | X            | Deterministic |
| 70               | C      | CH      | CaSi                       | 701 702<br>703              | 0.03                           | 0.5                                                               | 0.53                                                                  | CH      | X            | Deterministic |
| 71               | C      | CH      | CaSi                       | 701 702<br>703              | 0.05                           | 0.5                                                               | 0.87                                                                  | CH      | X            | Deterministic |
| 72               | C      | CH      | CaSi                       | 701 702<br>703              | 0.08                           | 0.5                                                               | 1.38                                                                  | CH      | X            | Deterministic |
| 73               | C      | CH      | Capillary<br>Active<br>PUR | 704 705<br>706              | 0.03                           | 0.5                                                               | 1.07                                                                  | CH      | X            | Deterministic |
| 74               | C      | CH      | Capillary<br>Active<br>PUR | 704 705<br>706              | 0.05                           | 0.5                                                               | 1.72                                                                  | CH      | X            | Deterministic |
| 75               | C      | CH      | Capillary<br>Active<br>PUR | 704 705<br>706              | 0.08                           | 0.5                                                               | 2.69                                                                  | CH      | X            | Deterministic |

| IS /<br>CS<br>ID | Source | Country | IS                         | Materials<br>included<br>ID | Insulation<br>thickness<br>(m) | Existing<br>wall<br>thermal<br>resistance<br>(m <sup>2</sup> K/W) | Insulation<br>system<br>thermal<br>resistance<br>(m <sup>2</sup> K/W) | Climate | LCC<br>data* | Data type     |
|------------------|--------|---------|----------------------------|-----------------------------|--------------------------------|-------------------------------------------------------------------|-----------------------------------------------------------------------|---------|--------------|---------------|
| 76               | C      | CH      | Phenolic<br>Foam           | 707 708                     | 0.02                           | 0.5                                                               | 1.16                                                                  | CH      | -            | Deterministic |
| 77               | C      | CH      | Phenolic<br>Foam           | 707 708                     | 0.045                          | 0.5                                                               | 2.55                                                                  | CH      | -            | Deterministic |
| 78               | C      | CH      | Phenolic<br>Foam           | 707 708                     | 0.065                          | 0.5                                                               | 3.66                                                                  | CH      | -            | Deterministic |
| 79               | C      | CH      | Phenolic<br>Foam           | 707 708                     | 0.08                           | 0.5                                                               | 4.49                                                                  | CH      | -            | Deterministic |
| 80               | C      | CH      | Phenolic<br>Foam           | 707 708                     | 0.09                           | 0.5                                                               | 5.05                                                                  | CH      | -            | Deterministic |
| 81               | C      | CH      | Phenolic<br>Foam           | 707 708                     | 0.11                           | 0.5                                                               | 6.16                                                                  | CH      | -            | Deterministic |
| 82               | C      | CH      | AAC                        | 701 709<br>703              | 0.06                           | 0.5                                                               | 1.36                                                                  | CH      | X            | Deterministic |
| 83               | C      | CH      | AAC                        | 701 709<br>703              | 0.08                           | 0.5                                                               | 1.8                                                                   | CH      | X            | Deterministic |
| 84               | C      | CH      | AAC                        | 701 709<br>703              | 0.1                            | 0.5                                                               | 2.25                                                                  | CH      | X            | Deterministic |
| 85               | C      | CH      | Glass<br>Wool              | 710 711<br>708              | 0.07                           | 0.5                                                               | 2.24                                                                  | CH      | -            | Deterministic |
| 86               | C      | CH      | Glass<br>Wool              | 710 711<br>708              | 0.095                          | 0.5                                                               | 3.02                                                                  | CH      | -            | Deterministic |
| 87               | C      | CH      | Glass<br>Wool              | 710 711<br>708              | 0.12                           | 0.5                                                               | 3.8                                                                   | CH      | -            | Deterministic |
| 88               | C      | DE      | CaSi                       | 801 802<br>803              | 0.025                          | 0.5                                                               | 0.45                                                                  | DE      | X            | Deterministic |
| 89               | C      | DE      | CaSi                       | 801 802<br>803              | 0.03                           | 0.5                                                               | 0.53                                                                  | DE      | X            | Deterministic |
| 90               | C      | DE      | CaSi                       | 801 802<br>803              | 0.05                           | 0.5                                                               | 0.87                                                                  | DE      | X            | Deterministic |
| 91               | C      | DE      | CaSi                       | 801 802<br>803              | 0.08                           | 0.5                                                               | 1.38                                                                  | DE      | X            | Deterministic |
| 92               | C      | DE      | Capillary<br>Active<br>PUR | 804 805<br>806              | 0.03                           | 0.5                                                               | 1.07                                                                  | DE      | X            | Deterministic |
| 93               | C      | DE      | Capillary<br>Active<br>PUR | 804 805<br>806              | 0.05                           | 0.5                                                               | 1.72                                                                  | DE      | X            | Deterministic |
| 94               | C      | DE      | Capillary<br>Active<br>PUR | 804 805<br>806              | 0.08                           | 0.5                                                               | 2.69                                                                  | DE      | X            | Deterministic |
| 95               | C      | DE      | Phenolic<br>Foam           | 807 808                     | 0.02                           | 0.5                                                               | 1.16                                                                  | DE      | -            | Deterministic |
| 96               | C      | DE      | Phenolic<br>Foam           | 807 808                     | 0.045                          | 0.5                                                               | 2.55                                                                  | DE      | -            | Deterministic |
| 97               | C      | DE      | Phenolic<br>Foam           | 807 808                     | 0.065                          | 0.5                                                               | 3.66                                                                  | DE      | -            | Deterministic |
| 98               | C      | DE      | Phenolic<br>Foam           | 807 808                     | 0.08                           | 0.5                                                               | 4.49                                                                  | DE      | -            | Deterministic |
| 99               | C      | DE      | Phenolic<br>Foam           | 807 808                     | 0.09                           | 0.5                                                               | 5.05                                                                  | DE      | -            | Deterministic |
| 100              | C      | DE      | Phenolic<br>Foam           | 807 808                     | 0.11                           | 0.5                                                               | 6.16                                                                  | DE      | -            | Deterministic |
| 101              | C      | DE      | AAC                        | 801 809<br>803              | 0.06                           | 0.5                                                               | 1.36                                                                  | DE      | X            | Deterministic |
| 102              | C      | DE      | AAC                        | 801 809<br>803              | 0.08                           | 0.5                                                               | 1.8                                                                   | DE      | X            | Deterministic |
| 103              | C      | DE      | AAC                        | 801 809<br>803              | 0.1                            | 0.5                                                               | 2.25                                                                  | DE      | X            | Deterministic |
| 104              | C      | DE      | Glass<br>Wool              | 810 811<br>808              | 0.07                           | 0.5                                                               | 2.24                                                                  | DE      | -            | Deterministic |
| 105              | C      | DE      | Glass<br>Wool              | 810 811<br>808              | 0.095                          | 0.5                                                               | 3.02                                                                  | DE      | -            | Deterministic |
| 106              | C      | DE      | Glass<br>Wool              | 810 811<br>808              | 0.12                           | 0.5                                                               | 3.8                                                                   | DE      | -            | Deterministic |

| IS /<br>CS<br>ID | Source | Country | IS                         | Materials<br>included<br>ID | Insulation<br>thickness<br>(m) | Existing<br>wall<br>thermal<br>resistance<br>(m <sup>2</sup> K/W) | Insulation<br>system<br>thermal<br>resistance<br>(m <sup>2</sup> K/W) | Climate                  | LCC<br>data* | Data type     |
|------------------|--------|---------|----------------------------|-----------------------------|--------------------------------|-------------------------------------------------------------------|-----------------------------------------------------------------------|--------------------------|--------------|---------------|
| 107              | C      | BE      | CaSi                       | 901 902<br>903              | 0.025                          | 0.5                                                               | 0.45                                                                  | BE                       | X            | Deterministic |
| 108              | C      | BE      | CaSi                       | 901 902<br>903              | 0.03                           | 0.5                                                               | 0.53                                                                  | BE                       | X            | Deterministic |
| 109              | C      | BE      | CaSi                       | 901 902<br>903              | 0.05                           | 0.5                                                               | 0.87                                                                  | BE                       | X            | Deterministic |
| 110              | C      | BE      | CaSi                       | 901 902<br>903              | 0.08                           | 0.5                                                               | 1.38                                                                  | BE                       | X            | Deterministic |
| 111              | C      | BE      | Capillary<br>Active<br>PUR | 904 905<br>906              | 0.03                           | 0.5                                                               | 1.07                                                                  | BE                       | X            | Deterministic |
| 112              | C      | BE      | Capillary<br>Active<br>PUR | 904 905<br>906              | 0.05                           | 0.5                                                               | 1.72                                                                  | BE                       | X            | Deterministic |
| 113              | C      | BE      | Capillary<br>Active<br>PUR | 904 905<br>906              | 0.08                           | 0.5                                                               | 2.69                                                                  | BE                       | X            | Deterministic |
| 114              | C      | BE      | Phenolic<br>Foam           | 907 908                     | 0.02                           | 0.5                                                               | 1.16                                                                  | BE                       | -            | Deterministic |
| 115              | C      | BE      | Phenolic<br>Foam           | 907 908                     | 0.045                          | 0.5                                                               | 2.55                                                                  | BE                       | -            | Deterministic |
| 116              | C      | BE      | Phenolic<br>Foam           | 907 908                     | 0.065                          | 0.5                                                               | 3.66                                                                  | BE                       | -            | Deterministic |
| 117              | C      | BE      | Phenolic<br>Foam           | 907 908                     | 0.08                           | 0.5                                                               | 4.49                                                                  | BE                       | -            | Deterministic |
| 118              | C      | BE      | Phenolic<br>Foam           | 907 908                     | 0.09                           | 0.5                                                               | 5.05                                                                  | BE                       | -            | Deterministic |
| 119              | C      | BE      | Phenolic<br>Foam           | 907 908                     | 0.11                           | 0.5                                                               | 6.16                                                                  | BE                       | -            | Deterministic |
| 120              | C      | BE      | AAC                        | 901 909<br>903              | 0.06                           | 0.5                                                               | 1.36                                                                  | BE                       | X            | Deterministic |
| 121              | C      | BE      | AAC                        | 901 909<br>903              | 0.08                           | 0.5                                                               | 1.8                                                                   | BE                       | X            | Deterministic |
| 122              | C      | BE      | AAC                        | 901 909<br>903              | 0.1                            | 0.5                                                               | 2.25                                                                  | BE                       | X            | Deterministic |
| 123              | C      | BE      | Glass<br>Wool              | 910 911<br>908              | 0.07                           | 0.5                                                               | 2.24                                                                  | BE                       | -            | Deterministic |
| 124              | C      | BE      | Glass<br>Wool              | 910 911<br>908              | 0.095                          | 0.5                                                               | 3.02                                                                  | BE                       | -            | Deterministic |
| 125              | C      | BE      | Glass<br>Wool              | 910 911<br>908              | 0.12                           | 0.5                                                               | 3.8                                                                   | BE                       | -            | Deterministic |
| 126              | C      | IT      | CaSi                       | 1001<br>1002<br>1003        | 0.025                          | 0.5                                                               | 0.45                                                                  | Lombardia<br>Region (IT) | X            | Deterministic |
| 127              | C      | IT      | CaSi                       | 1001<br>1002<br>1003        | 0.03                           | 0.5                                                               | 0.53                                                                  | Lombardia<br>Region (IT) | X            | Deterministic |
| 128              | C      | IT      | CaSi                       | 1001<br>1002<br>1003        | 0.05                           | 0.5                                                               | 0.87                                                                  | Lombardia<br>Region (IT) | X            | Deterministic |
| 129              | C      | IT      | CaSi                       | 1001<br>1002<br>1003        | 0.08                           | 0.5                                                               | 1.38                                                                  | Lombardia<br>Region (IT) | X            | Deterministic |
| 130              | C      | IT      | Capillary<br>Active<br>PUR | 1004<br>1005<br>1006        | 0.03                           | 0.5                                                               | 1.07                                                                  | Lombardia<br>Region (IT) | -            | Deterministic |
| 131              | C      | IT      | Capillary<br>Active<br>PUR | 1004<br>1005<br>1006        | 0.05                           | 0.5                                                               | 1.72                                                                  | Lombardia<br>Region (IT) | -            | Deterministic |
| 132              | C      | IT      | Capillary<br>Active<br>PUR | 1004<br>1005<br>1006        | 0.08                           | 0.5                                                               | 2.69                                                                  | Lombardia<br>Region (IT) | -            | Deterministic |
| 133              | C      | IT      | Phenolic<br>Foam           | 1007<br>1008                | 0.02                           | 0.5                                                               | 1.16                                                                  | Lombardia<br>Region (IT) | -            | Deterministic |

| IS /<br>CS<br>ID | Source | Country | IS               | Materials<br>included<br>ID | Insulation<br>thickness<br>(m) | Existing<br>wall<br>thermal<br>resistance<br>(m <sup>2</sup> K/W) | Insulation<br>system<br>thermal<br>resistance<br>(m <sup>2</sup> K/W) | Climate                  | LCC<br>data* | Data type     |
|------------------|--------|---------|------------------|-----------------------------|--------------------------------|-------------------------------------------------------------------|-----------------------------------------------------------------------|--------------------------|--------------|---------------|
| 134              | C      | IT      | Phenolic<br>Foam | 1007<br>1008                | 0.045                          | 0.5                                                               | 2.55                                                                  | Lombardia<br>Region (IT) | -            | Deterministic |
| 135              | C      | IT      | Phenolic<br>Foam | 1007<br>1008                | 0.065                          | 0.5                                                               | 3.66                                                                  | Lombardia<br>Region (IT) | -            | Deterministic |
| 136              | C      | IT      | Phenolic<br>Foam | 1007<br>1008                | 0.08                           | 0.5                                                               | 4.49                                                                  | Lombardia<br>Region (IT) | -            | Deterministic |
| 137              | C      | IT      | Phenolic<br>Foam | 1007<br>1008                | 0.09                           | 0.5                                                               | 5.05                                                                  | Lombardia<br>Region (IT) | -            | Deterministic |
| 138              | C      | IT      | Phenolic<br>Foam | 1007<br>1008                | 0.11                           | 0.5                                                               | 6.16                                                                  | Lombardia<br>Region (IT) | -            | Deterministic |
| 139              | C      | IT      | AAC              | 1001<br>1009<br>1003        | 0.06                           | 0.5                                                               | 1.36                                                                  | Lombardia<br>Region (IT) | X            | Deterministic |
| 140              | C      | IT      | AAC              | 1001<br>1009<br>1003        | 0.08                           | 0.5                                                               | 1.8                                                                   | Lombardia<br>Region (IT) | X            | Deterministic |
| 141              | C      | IT      | AAC              | 1001<br>1009<br>1003        | 0.1                            | 0.5                                                               | 2.25                                                                  | Lombardia<br>Region (IT) | X            | Deterministic |
| 142              | C      | IT      | Glass<br>Wool    | 1010<br>1011<br>1008        | 0.07                           | 0.5                                                               | 2.24                                                                  | Lombardia<br>Region (IT) | -            | Deterministic |
| 143              | C      | IT      | Glass<br>Wool    | 1010<br>1011<br>1008        | 0.095                          | 0.5                                                               | 3.02                                                                  | Lombardia<br>Region (IT) | -            | Deterministic |
| 144              | C      | IT      | Glass<br>Wool    | 1010<br>1011<br>1008        | 0.12                           | 0.5                                                               | 3.8                                                                   | Lombardia<br>Region (IT) | -            | Deterministic |

## Energy sources

**Table 12 Summary table of energy sources included in the RiBuild software database. \*LCC data retrieved from:**  
<https://ec.europa.eu/eurostat/web/energy/data/database>

| Energy source | LCA<br>Source | Country | Insulation system         | LCC<br>data* | LCA<br>data | LCA<br>Method | Data type     |
|---------------|---------------|---------|---------------------------|--------------|-------------|---------------|---------------|
| 1             | A             | IT      | Gas                       | X            | X           | CML           | Stochastic    |
| 2             | A             | IT      | electricity               | X            | X           | CML           | Stochastic    |
| 3             | B             | CH      | Gas                       | X            | X           | CML           | Deterministic |
| 4             | B             | CH      | electricity               | X            | X           | CML           | Deterministic |
| 5             | B             | CH      | oil                       | X            | X           | CML           | Deterministic |
| 6             | B             | DK      | oil                       | X            | X           | RECIPE        | Deterministic |
| 7             | B             | DK      | Gas                       | X            | X           | RECIPE        | Deterministic |
| 8             | B             | DK      | Renewable energy          | -            | X           | RECIPE        | Deterministic |
| 9             | B             | DK      | electricity               | X            | X           | RECIPE        | Deterministic |
| 10            | B             | DK      | District heating          | X            | X           | RECIPE        | Deterministic |
| 11            | C             | BE      | Biomass furnace           | -            | X           | RECIPE        | Deterministic |
| 12            | C             | BE      | Natural gas boiler        | X            | X           | RECIPE        | Deterministic |
| 13            | C             | BE      | Oil boiler condensing     | -            | X           | RECIPE        | Deterministic |
| 14            | C             | BE      | Oil boiler non-condensing | -            | X           | RECIPE        | Deterministic |
| 15            | C             | DK      | Biomass furnace           | -            | X           | RECIPE        | Deterministic |
| 16            | C             | DK      | District Heating          | X            | X           | RECIPE        | Deterministic |
| 17            | C             | DK      | Natural gas boiler        | X            | X           | RECIPE        | Deterministic |

|    |   |    |                           |   |   |     |               |
|----|---|----|---------------------------|---|---|-----|---------------|
| 18 | C | DE | Biomass furnace           | - | X | CML | Deterministic |
| 19 | C | DE | Natural gas boiler        | X | X | CML | Deterministic |
| 20 | C | DE | Oil boiler condensing     | - | X | CML | Deterministic |
| 21 | C | DE | Oil boiler non-condensing | - | X | CML | Deterministic |
| 22 | C | IT | Biomass furnace           | - | X | CML | Deterministic |
| 23 | C | IT | Electricity               | X | X | CML | Deterministic |
| 24 | C | IT | Natural Gas Boiler        | X | X | CML | Deterministic |
| 25 | C | LT | Biomass furnace           | - | X | CML | Deterministic |
| 26 | C | LT | District Heating          | - | X | CML | Deterministic |
| 27 | C | LT | Natural gas boiler        | X | X | CML | Deterministic |
| 28 | C | SE | Biomass furnace           | - | X | CML | Deterministic |
| 29 | C | SE | District Heating          | - | X | CML | Deterministic |
| 30 | C | SE | Electricity               | X | X | CML | Deterministic |
| 31 | C | CH | Biomass furnace           | - | X | CML | Deterministic |
| 32 | C | CH | Natural gas boiler        | - | X | CML | Deterministic |
| 33 | C | CH | Oil boiler condensing     | - | X | CML | Deterministic |
| 34 | C | CH | Oil boiler non-condensing | - | X | CML | Deterministic |

| Energy source ID | Country | Energy source             | Data type     |
|------------------|---------|---------------------------|---------------|
| 1                | IT      | Gas                       | Stochastic    |
| 2                | IT      | electricity               | Stochastic    |
| 3                | CH      | Gas                       | Deterministic |
| 4                | CH      | electricity               | Deterministic |
| 5                | CH      | oil                       | Deterministic |
| 6                | DK      | oil                       | Deterministic |
| 7                | DK      | Gas                       | Deterministic |
| 8                | DK      | Renewable energy          | Deterministic |
| 9                | DK      | electricity               | Deterministic |
| 10               | DK      | District heating          | Deterministic |
| 11               | BE      | Biomass furnace           | Deterministic |
| 12               | BE      | Natural gas boiler        | Deterministic |
| 13               | BE      | Oil boiler condensing     | Deterministic |
| 14               | BE      | Oil boiler non-condensing | Deterministic |
| 15               | DK      | Biomass furnace           | Deterministic |
| 16               | DK      | District Heating          | Deterministic |
| 17               | DK      | Natural gas boiler        | Deterministic |
| 18               | DE      | Biomass furnace           | Deterministic |
| 19               | DE      | Natural gas boiler        | Deterministic |
| 20               | DE      | Oil boiler condensing     | Deterministic |
| 21               | DE      | Oil boiler non-condensing | Deterministic |
| 22               | IT      | Biomass furnace           | Deterministic |
| 23               | IT      | Electricity               | Deterministic |
| 24               | IT      | Natural Gas Boiler        | Deterministic |
| 25               | LT      | Biomass furnace           | Deterministic |
| 26               | LT      | District Heating          | Deterministic |
| 27               | LT      | Natural gas boiler        | Deterministic |

|    |    |                           |               |
|----|----|---------------------------|---------------|
| 28 | SE | Biomass furnace           | Deterministic |
| 29 | SE | District Heating          | Deterministic |
| 30 | SE | Electricity               | Deterministic |
| 31 | CH | Biomass furnace           | Deterministic |
| 32 | CH | Natural gas boiler        | Deterministic |
| 33 | CH | Oil boiler condensing     | Deterministic |
| 34 | CH | Oil boiler non-condensing | Deterministic |



## 1.5 Appendix 3. Software License

This tool has been developed by: Edoardo Baldoni, Marco D'Orazio, Elisa Di Giuseppe and Monica Iannaccone. It is based on the probabilistic LCA/LCC methodology developed by UNIVPM and HES-SO within WP5/RIBuild project.

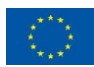

This project has received funding from the European Union's Horizon 2020 research and innovation programme under grant agreement No 637268.

### License

#### ***Attribution-NonCommercial-NoDerivs 3.0 Unported (CC BY-NC-ND 3.0)***

THE WORK (AS DEFINED BELOW) IS PROVIDED UNDER THE TERMS OF THIS CREATIVE COMMONS PUBLIC LICENSE ("CCPL" OR "LICENSE"). THE WORK IS PROTECTED BY COPYRIGHT AND/OR OTHER APPLICABLE LAW. ANY USE OF THE WORK OTHER THAN AS AUTHORIZED UNDER THIS LICENSE OR COPYRIGHT LAW IS PROHIBITED.

BY EXERCISING ANY RIGHTS TO THE WORK PROVIDED HERE, YOU ACCEPT AND AGREE TO BE BOUND BY THE TERMS OF THIS LICENSE. TO THE EXTENT THIS LICENSE MAY BE CONSIDERED TO BE A CONTRACT, THE LICENSOR GRANTS YOU THE RIGHTS CONTAINED HERE IN CONSIDERATION OF YOUR ACCEPTANCE OF SUCH TERMS AND CONDITIONS.

#### **1. Definitions**

a. **"Adaptation"** means a work based upon the Work, or upon the Work and other pre-existing works, such as a translation, adaptation, derivative work, arrangement of music or other alterations of a literary or artistic work, or phonogram or performance and includes cinematographic adaptations or any other form in which the Work may be recast, transformed, or adapted including in any form recognizably derived from the original, except that a work that constitutes a Collection will not be considered an Adaptation for the purpose of this License. For the avoidance of doubt, where the Work is a musical work, performance or phonogram, the synchronization of the Work in timed-relation with a moving image ("synching") will be considered an Adaptation for the purpose of this License.

b. **"Collection"** means a collection of literary or artistic works, such as encyclopedias and anthologies, or performances, phonograms or broadcasts, or other works or subject matter other than works listed in Section 1(f) below, which, by reason of the selection and arrangement of their contents, constitute intellectual creations, in which the Work is included in its entirety in unmodified form along with one or more other contributions, each constituting separate and independent works in themselves, which together are assembled into a collective whole. A work that constitutes a Collection will not be considered an Adaptation (as defined above) for the purposes of this License.

c. **"Distribute"** means to make available to the public the original and copies of the Work through sale or other transfer of ownership.

d. **"Licensor"** means the individual, individuals, entity or entities that offer(s) the Work under the terms of this License.

e. **"Original Author"** means, in the case of a literary or artistic work, the individual, individuals, entity or entities who created the Work or if no individual or entity can be identified, the publisher; and in addition (i) in the case of a performance the actors, singers, musicians, dancers, and other persons who act, sing, deliver, declaim, play in, interpret or otherwise perform literary or artistic works or expressions of folklore; (ii) in the case of a phonogram the producer being the person or

legal entity who first fixes the sounds of a performance or other sounds; and, (iii) in the case of broadcasts, the organization that transmits the broadcast.

f. **"Work"** means the literary and/or artistic work offered under the terms of this License including without limitation any production in the literary, scientific and artistic domain, whatever may be the mode or form of its expression including digital form, such as a book, pamphlet and other writing; a lecture, address, sermon or other work of the same nature; a dramatic or dramatico-musical work; a choreographic work or entertainment in dumb show; a musical composition with or without words; a cinematographic work to which are assimilated works expressed by a process analogous to cinematography; a work of drawing, painting, architecture, sculpture, engraving or lithography; a photographic work to which are assimilated works expressed by a process analogous to photography; a work of applied art; an illustration, map, plan, sketch or three-dimensional work relative to geography, topography, architecture or science; a performance; a broadcast; a phonogram; a compilation of data to the extent it is protected as a copyrightable work; or a work performed by a variety or circus performer to the extent it is not otherwise considered a literary or artistic work.

g. **"You"** means an individual or entity exercising rights under this License who has not previously violated the terms of this License with respect to the Work, or who has received express permission from the Licensor to exercise rights under this License despite a previous violation.

h. **"Publicly Perform"** means to perform public recitations of the Work and to communicate to the public those public recitations, by any means or process, including by wire or wireless means or public digital performances; to make available to the public Works in such a way that members of the public may access these Works from a place and at a place individually chosen by them; to perform the Work to the public by any means or process and the communication to

the public of the performances of the Work, including by public digital performance; to broadcast and rebroadcast the Work by any means including signs, sounds or images.

i. **"Reproduce"** means to make copies of the Work by any means including without limitation by sound or visual recordings and the right of fixation and reproducing fixations of the Work, including storage of a protected performance or phonogram in digital form or other electronic medium.

**2. Fair Dealing Rights.** Nothing in this License is intended to reduce, limit, or restrict any uses free from copyright or rights arising from limitations or exceptions that are provided for in connection with the copyright protection under copyright law or other applicable laws.

**3. License Grant.** Subject to the terms and conditions of this License, Licensor hereby grants You a worldwide, royalty-free, non-exclusive, perpetual (for the duration of the applicable copyright) license to exercise the rights in the Work as stated below:

a. to Reproduce the Work, to incorporate the Work into one or more Collections, and to Reproduce the Work as incorporated in the Collections; and,

b. to Distribute and Publicly Perform the Work including as incorporated in Collections.

The above rights may be exercised in all media and formats whether now known or hereafter devised. The above rights include the right to make such modifications as are technically necessary to exercise the rights in other media and formats, but otherwise you have no rights to make Adaptations. Subject to 8(f), all rights not expressly granted by Licensor are hereby reserved, including but not limited to the rights set forth in Section 4(d).

**4. Restrictions.** The license granted in Section 3 above is expressly made subject to and limited by the following restrictions:

a. You may Distribute or Publicly Perform the Work only under the terms of this License. You must include a copy of, or the Uniform Resource Identifier (URI) for, this License with every copy of the Work You Distribute or Publicly Perform. You may not offer or impose any terms on the Work that restrict the terms of this License or the ability of the recipient of the Work to exercise the rights

granted to that recipient under the terms of the License. You may not sublicense the Work. You must keep intact all notices that refer to this License and to the disclaimer of warranties with every copy of the Work You Distribute or Publicly Perform. When You Distribute or Publicly Perform the Work, You may not impose any effective technological measures on the Work that restrict the ability of a recipient of the Work from You to exercise the rights granted to that recipient under the terms of the License. This Section 4(a) applies to the Work as incorporated in a Collection, but this does not require the Collection apart from the Work itself to be made subject to the terms of this License. If You create a Collection, upon notice from any Licensor You must, to the extent practicable, remove from the Collection any credit as required by Section 4(c), as requested.

b. You may not exercise any of the rights granted to You in Section 3 above in any manner that is primarily intended for or directed toward commercial advantage or private monetary compensation. The exchange of the Work for other copyrighted works by means of digital file-sharing or otherwise shall not be considered to be intended for or directed toward commercial advantage or private monetary compensation, provided there is no payment of any monetary compensation in connection with the exchange of copyrighted works.

c. If You Distribute, or Publicly Perform the Work or Collections, You must, unless a request has been made pursuant to Section 4(a), keep intact all copyright notices for the Work and provide, reasonable to the medium or means You are utilizing: (i) the name of the Original Author (or pseudonym, if applicable) if supplied, and/or if the Original Author and/or Licensor designate another party or parties (e.g., a sponsor institute, publishing entity, journal) for attribution ("Attribution Parties") in Licensor's copyright notice, terms of service or by other reasonable means, the name of such party or parties; (ii) the title of the Work if supplied; (iii) to the extent reasonably practicable, the URI, if any, that Licensor specifies to be associated with the Work, unless such URI does not refer to the copyright notice or licensing information for the Work. The credit required by this Section 4(c) may be implemented in any reasonable manner; provided, however, that in the case of a Collection, at a minimum such credit will appear, if a credit for all contributing authors of Collection appears, then as part of these credits and in a manner at least as prominent as the credits for the other contributing authors. For the avoidance of doubt, You may only use the credit required by this Section for the purpose of attribution in the manner set out above and, by exercising Your rights under this License, You may not implicitly or explicitly assert or imply any connection with, sponsorship or endorsement by the Original Author, Licensor and/or Attribution Parties, as appropriate, of You or Your use of the Work, without the separate, express prior written permission of the Original Author, Licensor and/or Attribution Parties.

d. For the avoidance of doubt: i. **Non-waivable Compulsory License Schemes.** In those jurisdictions in which the right to collect royalties through any statutory or compulsory licensing scheme cannot be waived, the Licensor reserves the exclusive right to collect such royalties for any exercise by You of the rights granted under this License;

ii. **Waivable Compulsory License Schemes.** In those jurisdictions in which the right to collect royalties through any statutory or compulsory licensing scheme can be waived, the Licensor reserves the exclusive right to collect such royalties for any exercise by You of the rights granted under this License if Your exercise of such rights is for a purpose or use

which is otherwise than noncommercial as permitted under Section 4(b) and otherwise waives the right to collect royalties through any statutory or compulsory licensing scheme; and,

iii. **Voluntary License Schemes.** The Licensor reserves the right to collect royalties, whether individually or, in the event that the Licensor is a member of a collecting society that administers voluntary licensing schemes, via that society, from any exercise by You of the rights granted under this License that is for a purpose or use which is otherwise than noncommercial as permitted under Section 4(b).

e. Except as otherwise agreed in writing by the Licensor or as may be otherwise permitted by applicable law, if You Reproduce, Distribute or Publicly Perform the Work either by itself or as part of any Collections, You must not distort, mutilate, modify or take other derogatory action in relation to the Work which would be prejudicial to the Original Author's honor or reputation.

## **5. Representations, Warranties and Disclaimer**

UNLESS OTHERWISE MUTUALLY AGREED BY THE PARTIES IN WRITING, LICENSOR OFFERS THE WORK AS-IS AND MAKES NO REPRESENTATIONS OR WARRANTIES OF ANY KIND CONCERNING THE WORK, EXPRESS, IMPLIED, STATUTORY OR OTHERWISE, INCLUDING, WITHOUT LIMITATION, WARRANTIES OF TITLE, MERCHANTIBILITY, FITNESS FOR A PARTICULAR PURPOSE, NONINFRINGEMENT, OR THE ABSENCE OF LATENT OR OTHER DEFECTS, ACCURACY, OR THE PRESENCE OF ABSENCE OF ERRORS, WHETHER OR NOT DISCOVERABLE. SOME JURISDICTIONS DO NOT ALLOW THE EXCLUSION OF IMPLIED WARRANTIES, SO SUCH EXCLUSION MAY NOT APPLY TO YOU.

**6. Limitation on Liability.** EXCEPT TO THE EXTENT REQUIRED BY APPLICABLE LAW, IN NO EVENT WILL LICENSOR BE LIABLE TO YOU ON ANY LEGAL THEORY FOR ANY SPECIAL, INCIDENTAL, CONSEQUENTIAL, PUNITIVE OR EXEMPLARY DAMAGES ARISING OUT OF THIS LICENSE OR THE USE OF THE WORK, EVEN IF LICENSOR HAS BEEN ADVISED OF THE POSSIBILITY OF SUCH DAMAGES.

## **7. Termination**

a. This License and the rights granted hereunder will terminate automatically upon any breach by You of the terms of this License. Individuals or entities who have received Collections from You under this License, however, will not have their licenses terminated provided such individuals or entities remain in full compliance with those licenses. Sections 1, 2, 5, 6, 7, and 8 will survive any termination of this License.

b. Subject to the above terms and conditions, the license granted here is perpetual (for the duration of the applicable copyright in the Work). Notwithstanding the above, Licensor reserves the right to release the Work under different license terms or to stop distributing the Work at any time; provided, however that any such election will not serve to withdraw this License (or any other license that has been, or is required to be, granted under the terms of this License), and this License will continue in full force and effect unless terminated as stated above.

## **8. Miscellaneous**

a. Each time You Distribute or Publicly Perform the Work or a Collection, the Licensor offers to the recipient a license to the Work on the same terms and conditions as the license granted to You under this License.

b. If any provision of this License is invalid or unenforceable under applicable law, it shall not affect the validity or enforceability of the remainder of the terms of this License, and without further action by the parties to this agreement, such provision shall be reformed to the minimum extent necessary to make such provision valid and enforceable.

c. No term or provision of this License shall be deemed waived and no breach consented to unless such waiver or consent shall be in writing and signed by the party to be charged with such waiver or consent.

d. This License constitutes the entire agreement between the parties with respect to the Work licensed here. There are no understandings, agreements or representations with respect to the Work not specified here. Licensor shall not be bound by any additional provisions that may appear in any communication from You. This License may not be modified without the mutual written agreement of the Licensor and You.

e. The rights granted under, and the subject matter referenced, in this License were drafted utilizing the terminology of the Berne Convention for the Protection of Literary and Artistic Works (as amended on September 28, 1979), the Rome Convention of 1961, the WIPO Copyright Treaty of 1996, the WIPO Performances and Phonograms Treaty of 1996 and the Universal Copyright Convention (as revised on July 24, 1971). These rights and subject matter take effect in the relevant jurisdiction in

which the License terms are sought to be enforced according to the corresponding provisions of the implementation of those treaty provisions in the applicable national law. If the standard suite of rights granted under applicable copyright law includes additional rights not granted under this License, such additional rights are deemed to be included in the License; this License is not intended to restrict the license of any rights under applicable law.
